# Supplementary material
Source: publisher figshare collection journal article supplement (https://karger.figshare.com/articles/dataset/_/14247101)

Figure S7, Sinet et al.: Phosphorylation levels of GSK3 $\beta$  and expression of markers of inflammation in the hippocampus of I-G6pc $^{-/-}$  mice

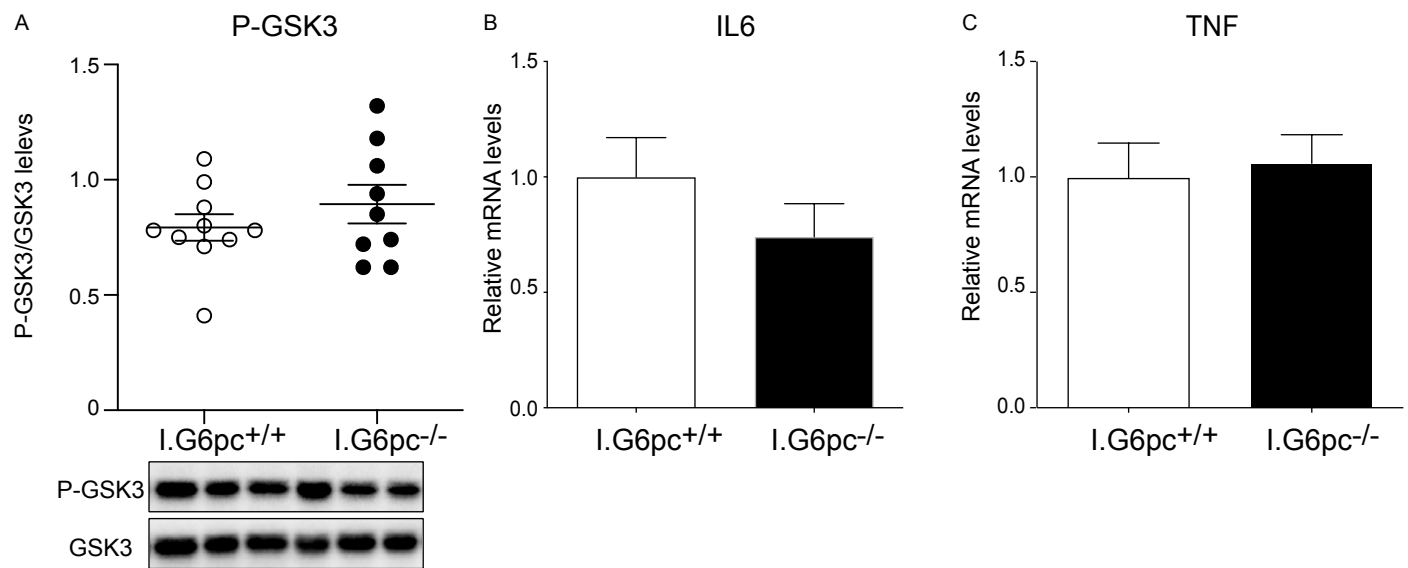

Supplement: Supplementary file 2 [file 1]
