# Supplementary material
Source: publisher figshare collection journal article supplement (https://karger.figshare.com/articles/dataset/_/14247101)
Supplement: Supplementary file 5 [file 1]

Figure S9. Sinet et al. : Raw data of the blots quantified in the study (images and quantification).

# RAW DATA – FIGURE 3

Hypothalamus

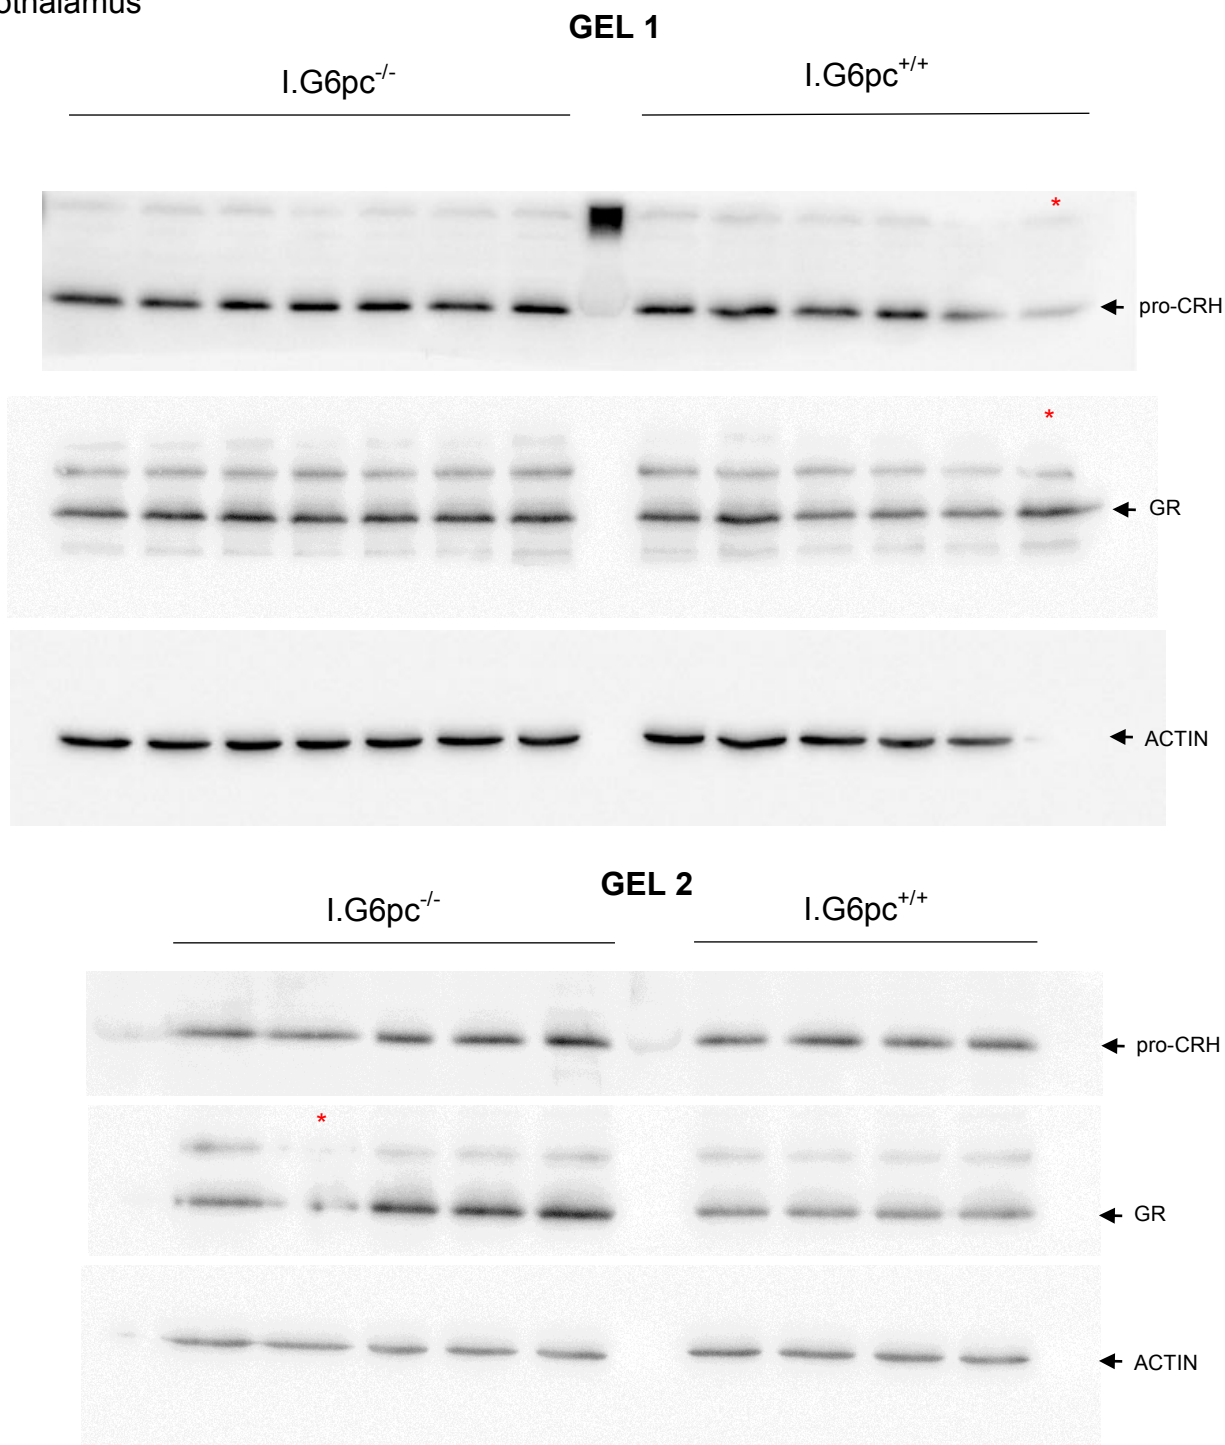

\* : these samples were not taken into account for the quantification (lack of band)

|                       | samples |       | pro-CRH | b-Actin | Ratio | mean | T-test actin levels |
|-----------------------|---------|-------|---------|---------|-------|------|---------------------|
| I.G6pc <sup>+/+</sup> | Lane 7  | GEL 2 | 25.838  | 27.061  | 0.95  | 1.20 | 0.81                |
|                       | Lane 8  |       | 32.141  | 27.794  | 1.16  |      |                     |
|                       | Lane 9  |       | 26.057  | 26.266  | 0.99  |      |                     |
|                       | Lane 10 |       | 24.354  | 20.595  | 1.18  |      |                     |
|                       | Lane 9  | GEL 1 | 54.926  | 44.262  | 1.24  |      |                     |
|                       | Lane 10 |       | 66.236  | 44.367  | 1.49  |      |                     |
|                       | Lane 11 |       | 55.897  | 40.988  | 1.36  |      |                     |
|                       | Lane 12 |       | 47.887  | 31.271  | 1.53  |      |                     |
|                       | Lane 13 |       | 27.305  | 29.625  | 0.92  |      |                     |
| I.G6pc <sup>-/-</sup> | Lane 1  | GEL 2 | 41.731  | 30.5    | 1.37  | 1.44 |                     |
|                       | Lane 2  |       | 33.928  | 25.264  | 1.34  |      |                     |
|                       | Lane 3  |       | 26.883  | 19.252  | 1.40  |      |                     |
|                       | Lane 4  |       | 33.152  | 23.415  | 1.42  |      |                     |
|                       | Lane 5  |       | 40.939  | 22.888  | 1.79  |      |                     |
|                       | Lane 1  | GEL 1 | 73.906  | 44.104  | 1.68  |      |                     |
|                       | Lane 2  |       | 53.591  | 40.235  | 1.33  |      |                     |
|                       | Lane 3  |       | 53.033  | 39.605  | 1.34  |      |                     |
|                       | Lane 4  |       | 48.737  | 36.733  | 1.33  |      |                     |
|                       | Lane 5  |       | 57.353  | 38.817  | 1.48  |      |                     |
|                       | Lane 6  |       | 56.115  | 44.262  | 1.27  |      |                     |
|                       | Lane 7  |       | 57.207  | 35.595  | 1.61  |      |                     |

|                       | samples |       | GR     | b-Actin | Ratio | mean | T-test actin levels |
|-----------------------|---------|-------|--------|---------|-------|------|---------------------|
| I.G6pc <sup>+/+</sup> | Lane 7  | GEL 2 | 35.847 | 27.061  | 1.32  | 1.50 | 0.68                |
|                       | Lane 8  |       | 32.936 | 27.794  | 1.19  |      |                     |
|                       | Lane 9  |       | 30.659 | 26.266  | 1.17  |      |                     |
|                       | Lane 10 |       | 33.241 | 20.595  | 1.61  |      |                     |
|                       | Lane 9  | GEL 1 | 75.387 | 44.262  | 1.70  |      |                     |
|                       | Lane 10 |       | 87.231 | 44.367  | 1.97  |      |                     |
|                       | Lane 11 |       | 52.827 | 40.988  | 1.29  |      |                     |
|                       | Lane 12 |       | 49.895 | 31.271  | 1.60  |      |                     |
|                       | Lane 13 |       | 50.158 | 29.625  | 1.69  |      |                     |
| I.G6pc <sup>-/-</sup> | Lane 1  | GEL 2 | 50.096 | 30.5    | 1.64  | 2.05 |                     |
|                       | Lane 2  |       |        |         |       |      |                     |
|                       | Lane 3  |       | 52.42  | 19.252  | 2.72  |      |                     |
|                       | Lane 4  |       | 58.923 | 23.415  | 2.52  |      |                     |
|                       | Lane 5  |       | 63.242 | 22.888  | 2.76  |      |                     |
|                       | Lane 1  | GEL 1 | 72.379 | 44.104  | 1.64  |      |                     |
|                       | Lane 2  |       | 73.921 | 40.235  | 1.84  |      |                     |
|                       | Lane 3  |       | 81.215 | 39.605  | 2.05  |      |                     |
|                       | Lane 4  |       | 66.589 | 36.733  | 1.81  |      |                     |
|                       | Lane 5  |       | 68.431 | 38.817  | 1.76  |      |                     |
|                       | Lane 6  |       | 73.808 | 44.262  | 1.67  |      |                     |
|                       | Lane 7  |       | 76.628 | 35.595  | 2.15  |      |                     |

# Hippocampus GR

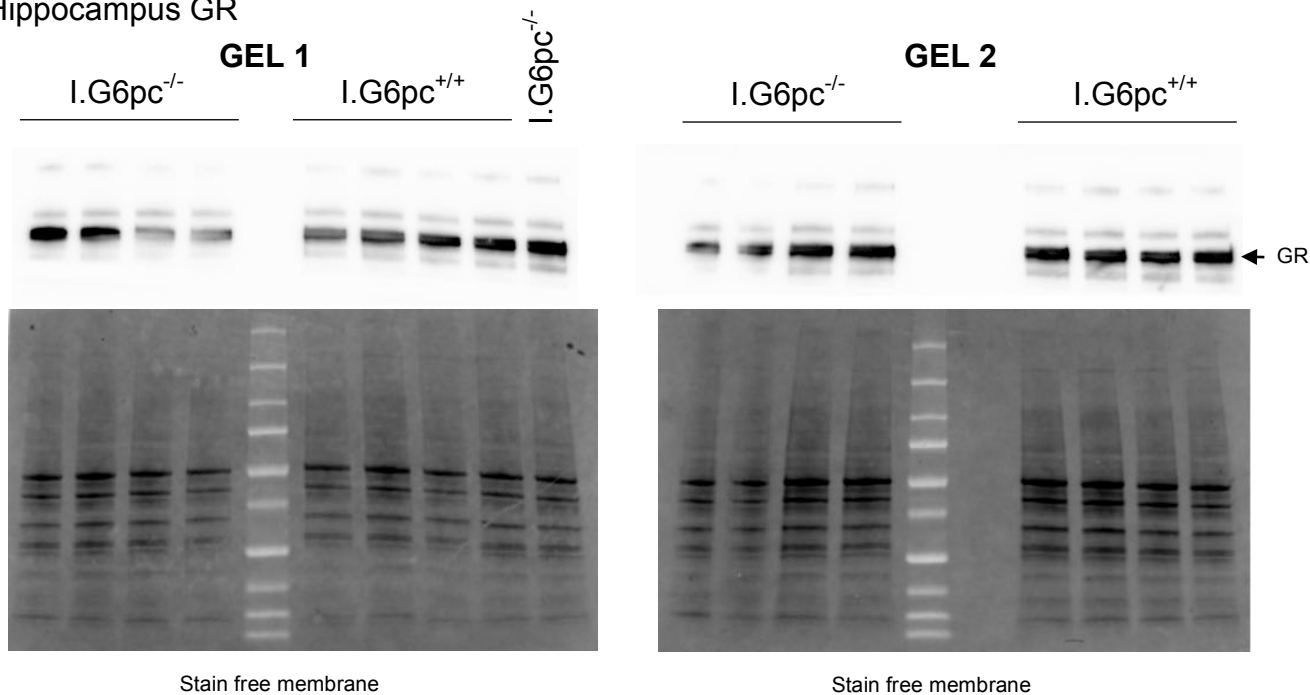

|                       | samples | GEL   | Volume (Int) | Norm. Factor | Norm. Vol. (Int) | Mean        |
|-----------------------|---------|-------|--------------|--------------|------------------|-------------|
| I.G6pc <sup>-/-</sup> | Lane 1  | Gel-1 | 193828050    | 1            | 193828050        | 123466794.2 |
|                       | Lane 2  |       | 165646650    | 0.880903     | 145918599        |             |
|                       | Lane 3  |       | 74414210     | 1.004911     | 74779640         |             |
|                       | Lane 4  |       | 81407560     | 1.225989     | 99804784         |             |
|                       | Lane 10 |       | 206168040    | 0.861774     | 177670184        |             |
|                       | Lane 2  | Gel-2 | 87460920     | 1            | 87460920         |             |
|                       | Lane 3  |       | 109672296    | 0.886908     | 97269260         |             |
|                       | Lane 4  |       | 185154816    | 0.593143     | 109823221        |             |
|                       | Lane 5  |       | 203228256    | 0.613332     | 124646490        |             |
|                       |         |       |              |              |                  |             |
| I.G6pc <sup>+/+</sup> | Lane 6  | Gel-1 | 124490340    | 1.068097     | 132967742        | 158641314.1 |
|                       | Lane 7  |       | 145809950    | 0.899555     | 131164079        |             |
|                       | Lane 8  |       | 148830110    | 1.222193     | 181899135        |             |
|                       | Lane 9  |       | 175948890    | 0.968932     | 170482429        |             |
|                       | Lane 6  | Gel-2 | 237325114    | 0.733804     | 174150097        |             |
|                       | Lane 7  |       | 229944633    | 0.728546     | 167525175        |             |
|                       | Lane 8  |       | 199836912    | 0.746434     | 149165036        |             |
|                       | Lane 9  |       | 165677764    | 0.976455     | 161776820        |             |
|                       |         |       |              |              |                  |             |

# RAW DATA – FIGURE 4

## Hippocampus BDNF

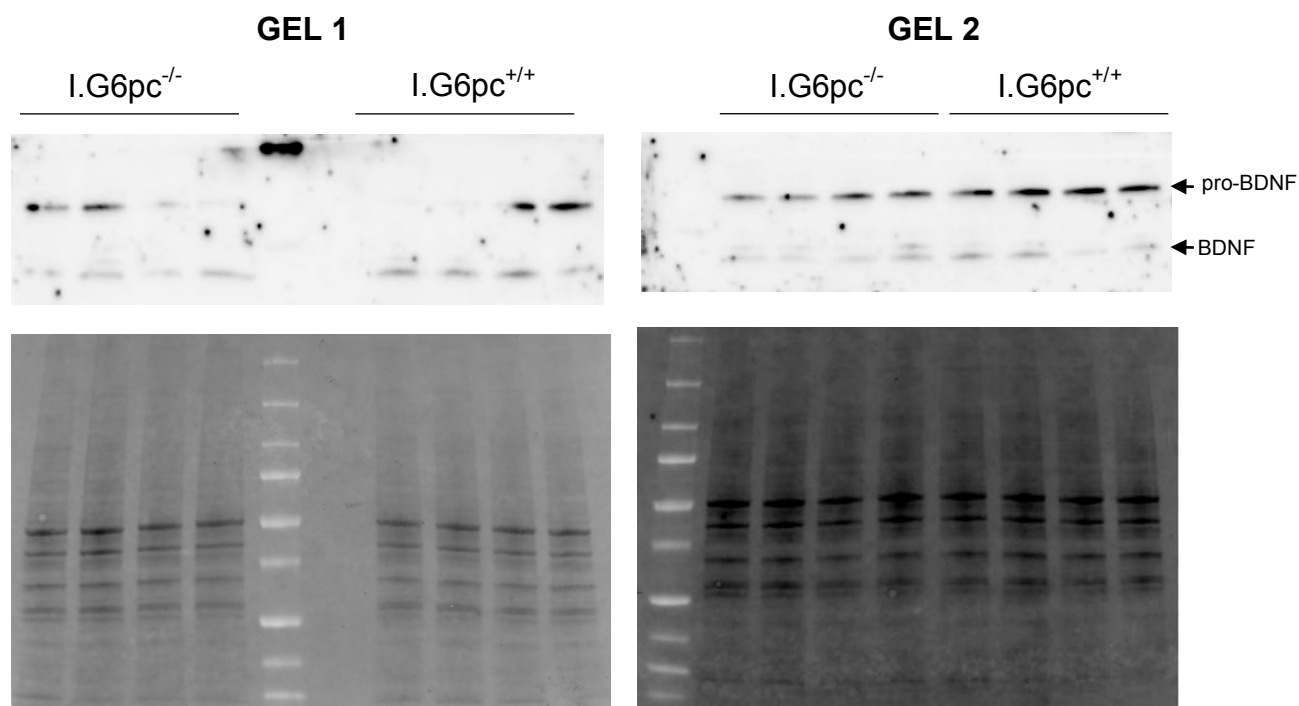

|           |      | Channel | Volume (Int)   | Norm. Factor | Norm. Vol. (Int) | Mean    |
|-----------|------|---------|----------------|--------------|------------------|---------|
| I-G6pc-/- | Gel1 | Lane 1  | 1615336        | 1            | 1615336          | 1716141 |
|           |      | Lane 2  | 1951504        | 0.936988     | 1828535          |         |
|           |      | Lane 3  | 1159108        | 1.10379      | 1279412          |         |
|           |      | Lane 4  | 2408468        | 1.006235     | 2423484          |         |
|           | Gel2 | Lane 2  | 1711400        | 1            | 1711400          |         |
|           |      | Lane 3  | 1009300        | 1.063405     | 1073294          |         |
|           |      | Lane 4  | 1350100        | 1.252249     | 1690662          |         |
|           |      | Lane 5  | 2374100        | 0.887496     | 2107004          |         |
|           |      |         |                |              |                  |         |
| I-G6pc+/+ | Gel1 | Lane 7  | 3627192        | 0.909272     | 3298105          | 2604271 |
|           |      | Lane 8  | 3172344        | 0.863356     | 2738861          |         |
|           |      | Lane 9  | 4416828        | 0.803802     | 3550256          |         |
|           |      | Lane 10 | 2314260        | 0.446737     | 1033865          |         |
|           | Gel2 | Lane 6  | 3187000        | 1.02528      | 3267567          |         |
|           |      | Lane 7  | 2820400        | 0.966394     | 2725618          |         |
|           |      | Lane 8  | Signal too low | 1.008177     | Signal too low   |         |
|           |      | Lane 9  | 1721400        | 0.938553     | 1615624          |         |

# Hippocampus P-CREB

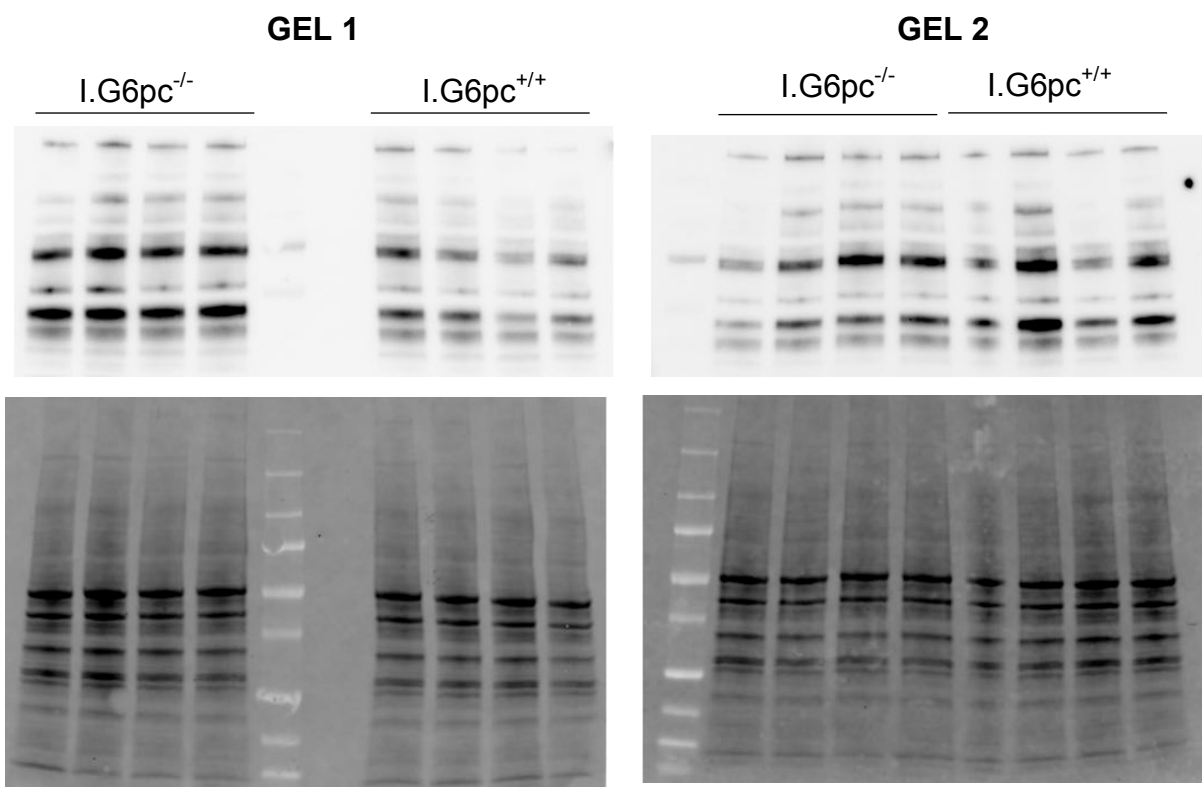

|           | samples | GEL   | Volume (Int) | Norm.<br>Factor | Norm. Vol. (Int) | Mean     |
|-----------|---------|-------|--------------|-----------------|------------------|----------|
| I.G6pc-/- | Lane 1  | Gel-1 | 42195105     | 1               | 42195105         | 35034472 |
|           | Lane 2  |       | 45494721     | 0.98            | 44562287         |          |
|           | Lane 3  |       | 41743836     | 1.05            | 43898561         |          |
|           | Lane 4  |       | 54512748     | 1.07            | 58375854         |          |
|           | Lane 2  | Gel-2 | 8191440      | 1.00            | 8171072          |          |
|           | Lane 3  |       | 20163516     | 1.33            | 26902223         |          |
|           | Lane 4  |       | 20404386     | 1.27            | 25880669         |          |
|           | Lane 5  |       | 24411942     | 1.24            | 30290009         |          |
|           |         |       |              |                 |                  |          |
| I.G6pc+/+ | Lane 7  | Gel-1 | 29437308     | 1.21            | 35693568         | 28427955 |
|           | Lane 8  |       | 23732064     | 1.24            | 29353574         |          |
|           | Lane 9  |       | 9678600      | 1.09            | 10568541         |          |
|           | Lane 10 |       | 18646695     | 1.43            | 26639796         |          |
|           | Lane 6  | Gel-2 | 15778566     | 1.34            | 21166758         |          |
|           | Lane 7  |       | 49127808     | 1.16            | 57110617         |          |
|           | Lane 8  |       | 17708502     | 1.05            | 18578607         |          |
|           | Lane 9  |       | 28312176     | 1               | 28312176         |          |

## Hippocampus CREB

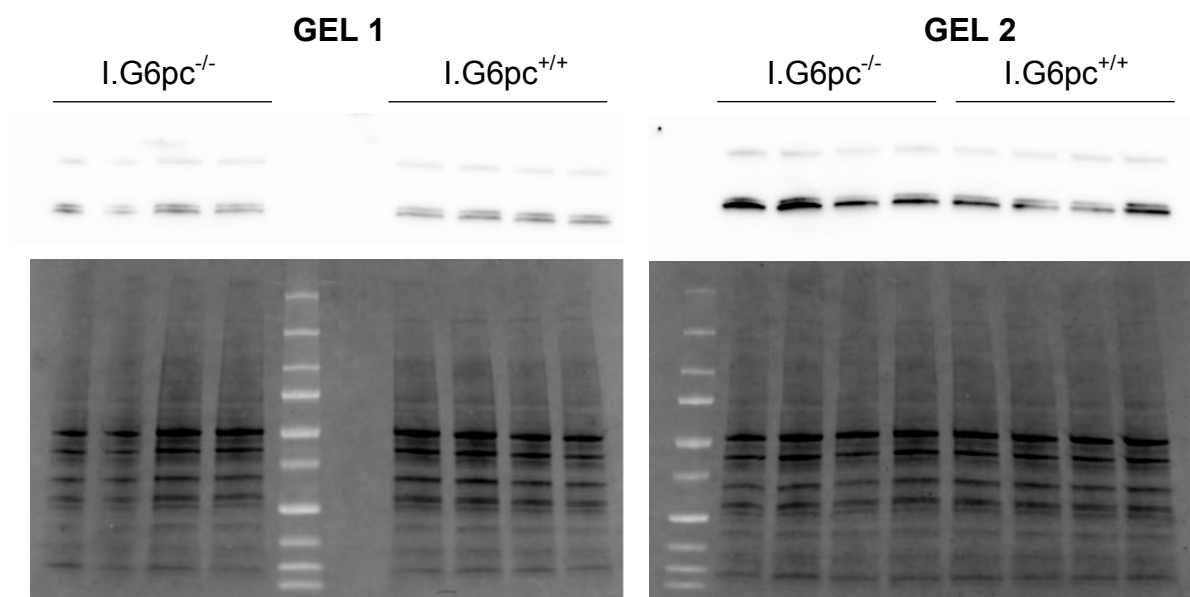

|           | samples | GEL   | Volume (Int) | Norm.<br>Factor | Norm. Vol. (Int) | Mean     |
|-----------|---------|-------|--------------|-----------------|------------------|----------|
| I.G6pc-/- | Lane 1  | Gel-1 | 13456692     | 1               | 13456692         | 25702246 |
|           | Lane 2  |       | 6624165      | 1.010789        | 6695633          |          |
|           | Lane 3  |       | 21431274     | 0.62989         | 13499352         |          |
|           | Lane 4  |       | 15617679     | 0.692642        | 10817464         |          |
|           | Lane 2  | Gel-2 | 55427772     | 1               | 55427772         |          |
|           | Lane 3  |       | 67046076     | 0.680497        | 45624648         |          |
|           | Lane 4  |       | 36652704     | 0.933212        | 34204747         |          |
|           | Lane 5  |       | 38973754     | 0.664336        | 25891663         |          |
|           |         |       |              |                 |                  |          |
| I.G6pc+/+ | Lane 7  | Gel-1 | 14770332     | 0.599505        | 8854886          | 17485219 |
|           | Lane 8  |       | 18575829     | 0.608675        | 11306636         |          |
|           | Lane 9  |       | 18349509     | 0.707295        | 12978515         |          |
|           | Lane 10 |       | 16393440     | 0.763429        | 12515232         |          |
|           | Lane 6  | Gel-2 | 36778730     | 0.69365         | 25511567         |          |
|           | Lane 7  |       | 25722236     | 0.759339        | 19531892         |          |
|           | Lane 8  |       | 20244436     | 0.808811        | 16373927         |          |
|           | Lane 9  |       | 44600760     | 0.735617        | 32809097         |          |

## RAW DATA – FIGURE 5

### Hypothalamus

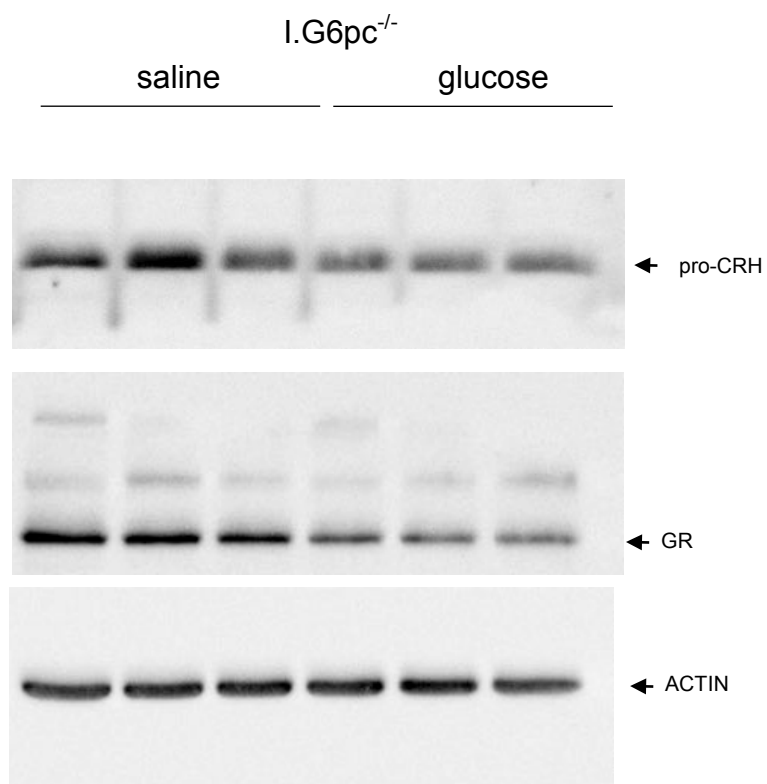

|              |        | GR    | pro-CRH | Actin |
|--------------|--------|-------|---------|-------|
| Saline       | Lane 1 | 36.65 | 44.40   | 20.32 |
|              | Lane 2 | 31.33 | 50.10   | 22.27 |
|              | Lane 3 | 26.71 | 38.06   | 21.73 |
| Glucose      | Lane 4 | 19.32 | 31.37   | 22.13 |
|              | Lane 5 | 17.67 | 28.65   | 22.93 |
|              | Lane 6 | 18.89 | 30.19   | 21.65 |
| T-test Actin |        | 0.31  |         |       |

## Hypothalamus

pro-CRH

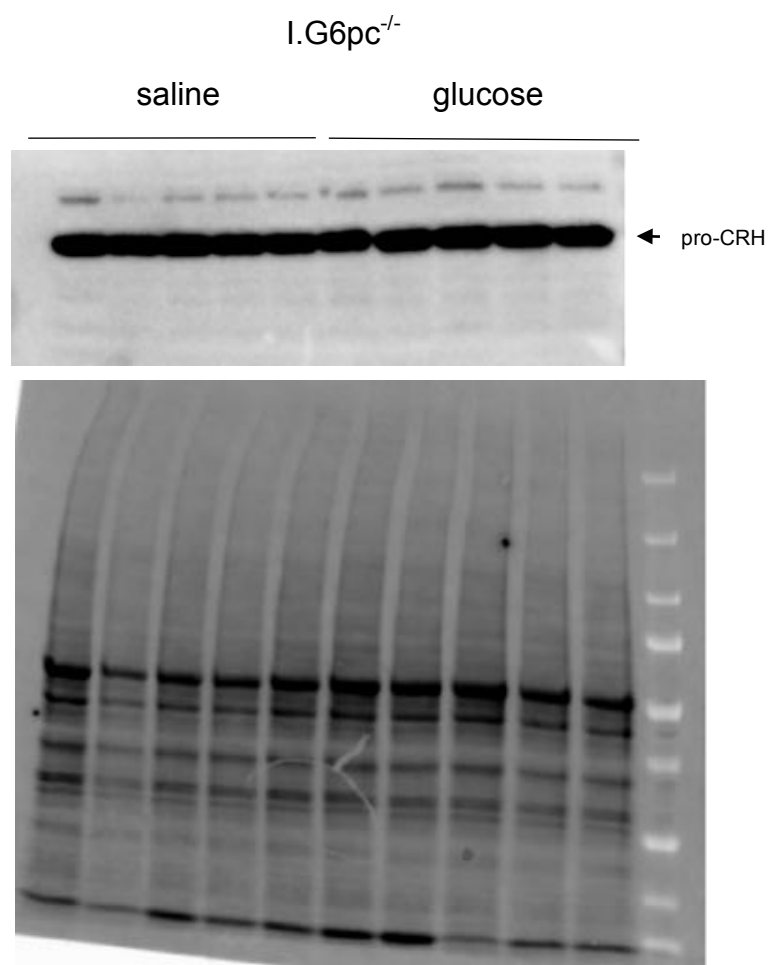

|         |         | Volume (Int) | Norm. factor | Norm. Vol. (Int) |
|---------|---------|--------------|--------------|------------------|
| Saline  | Lane 1  | 50451975     | 1            | 50451975         |
|         | Lane 2  | 41940675     | 1.610458     | 67543696         |
|         | Lane 3  | 48713625     | 1.124174     | 54762591         |
|         | Lane 4  | 43833450     | 1.001569     | 43902225         |
|         | Lane 5  | 37646775     | 0.916644     | 34508690         |
| Glucose | Lane 6  | 35210325     | 0.867297     | 30537809         |
|         | Lane 7  | 41555775     | 0.863352     | 35877261         |
|         | Lane 8  | 47884200     | 0.833537     | 39913252         |
|         | Lane 9  | 44510550     | 1.017975     | 45310627         |
|         | Lane 10 | 43104975     | 1.061356     | 45749724         |

GR

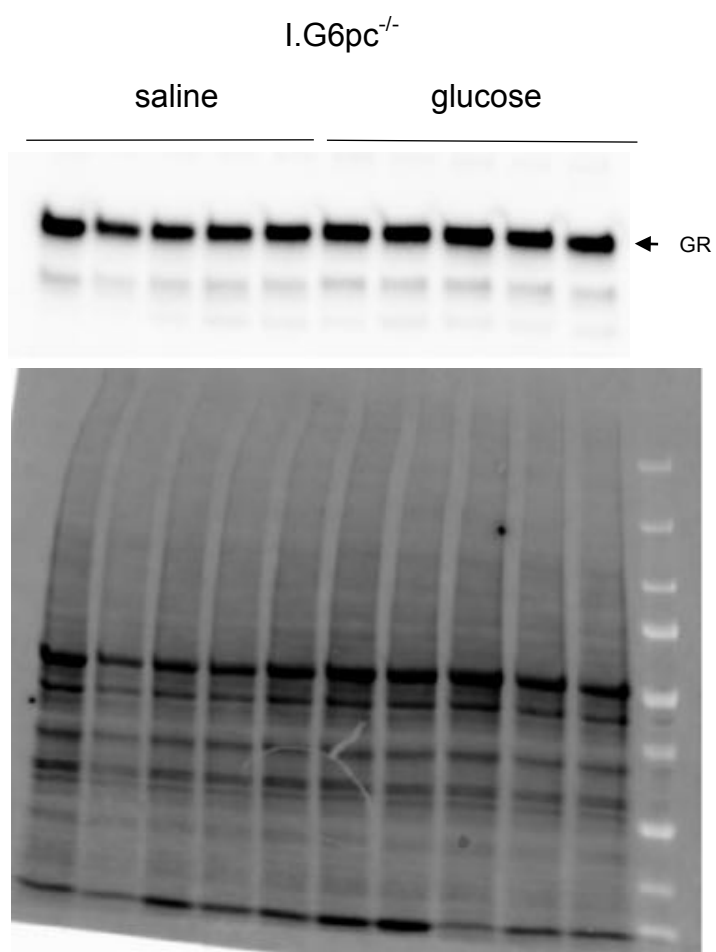

|         |         | Volume (Int) | Norm. factor | Norm. Vol. (Int) |
|---------|---------|--------------|--------------|------------------|
| Saline  | Lane 1  | 50514684     | 1            | 50514684         |
|         | Lane 2  | 29071350     | 1.610458     | 46818199         |
|         | Lane 3  | 34753224     | 1.124174     | 39068679         |
|         | Lane 4  | 37313100     | 1.001569     | 37371636         |
|         | Lane 5  | 41709690     | 0.916644     | 38232937         |
| Glucose | Lane 6  | 47333088     | 0.867297     | 41051848         |
|         | Lane 7  | 45655104     | 0.863352     | 39416442         |
|         | Lane 8  | 57571602     | 0.833537     | 47988046         |
|         | Lane 9  | 45264450     | 1.017975     | 46078073         |
|         | Lane 10 | 43635966     | 1.061356     | 46313284         |

## Hippocampus

GR

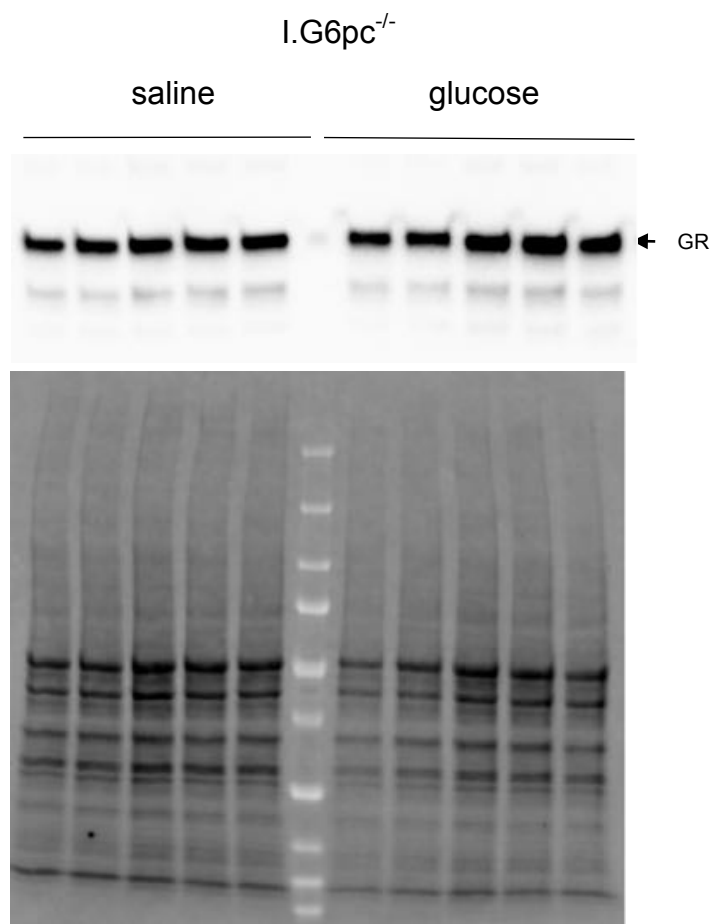

|         |         | Volume (Int) | Norm. factor | Norm. Vol. (Int) |
|---------|---------|--------------|--------------|------------------|
| Saline  | Lane 1  | 26372905     | 1            | 26372905         |
|         | Lane 2  | 31713695     | 0.867208     | 27502360         |
|         | Lane 3  | 38563395     | 0.709135     | 27346635         |
|         | Lane 4  | 36803260     | 0.792722     | 29174739         |
|         | Lane 5  | 40065090     | 0.860396     | 34471860         |
| Glucose | Lane 6  | 30566705     | 1.520852     | 46487435         |
|         | Lane 7  | 34767265     | 1.244502     | 43267926         |
|         | Lane 8  | 54367040     | 0.757727     | 41195386         |
|         | Lane 9  | 61816300     | 0.746132     | 46123108         |
|         | Lane 10 | 45227715     | 0.902831     | 40832997         |

BDNF

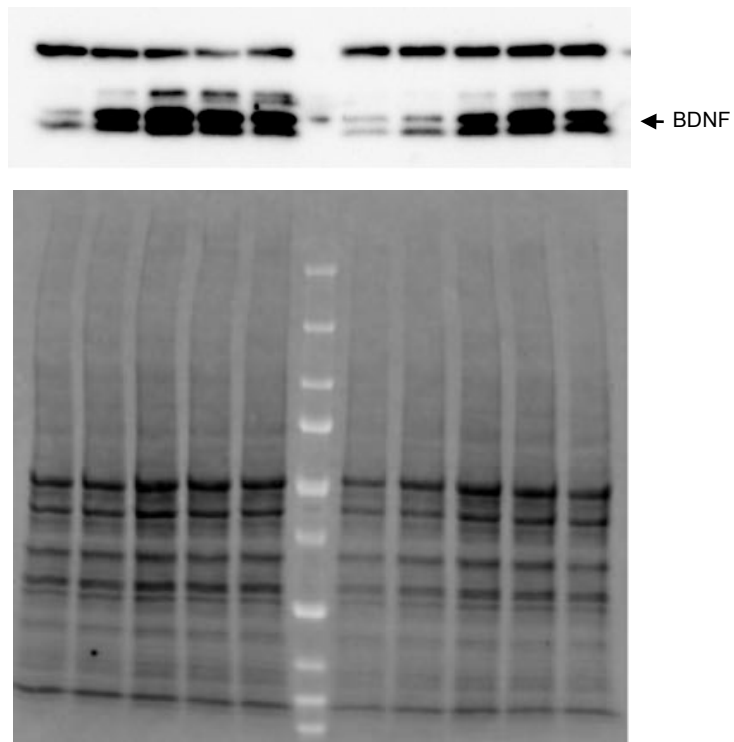

|         |         | Volume (Int) | Norm. factor | Norm. Vol. (Int) |
|---------|---------|--------------|--------------|------------------|
| Saline  | Lane 1  | 256566       | 1            | 256566           |
|         | Lane 2  | 1858975      | 0.867208     | 1612117          |
|         | Lane 3  | 7180798      | 0.709135     | 5092151          |
|         | Lane 4  | 7939516      | 0.792722     | 6293825          |
|         | Lane 5  | 8427333      | 0.860396     | 7250847          |
| Glucose | Lane 6  | 312503       | 1.520852     | 475270           |
|         | Lane 7  | 384666       | 1.244502     | 478717           |
|         | Lane 8  | 1870016      | 0.757727     | 1416962          |
|         | Lane 9  | 4348202      | 0.746132     | 3244331          |
|         | Lane 10 | 2344169      | 0.902831     | 2116389          |

RAW DATA – FIGURE 6

Hypothalamus

pro-CRH

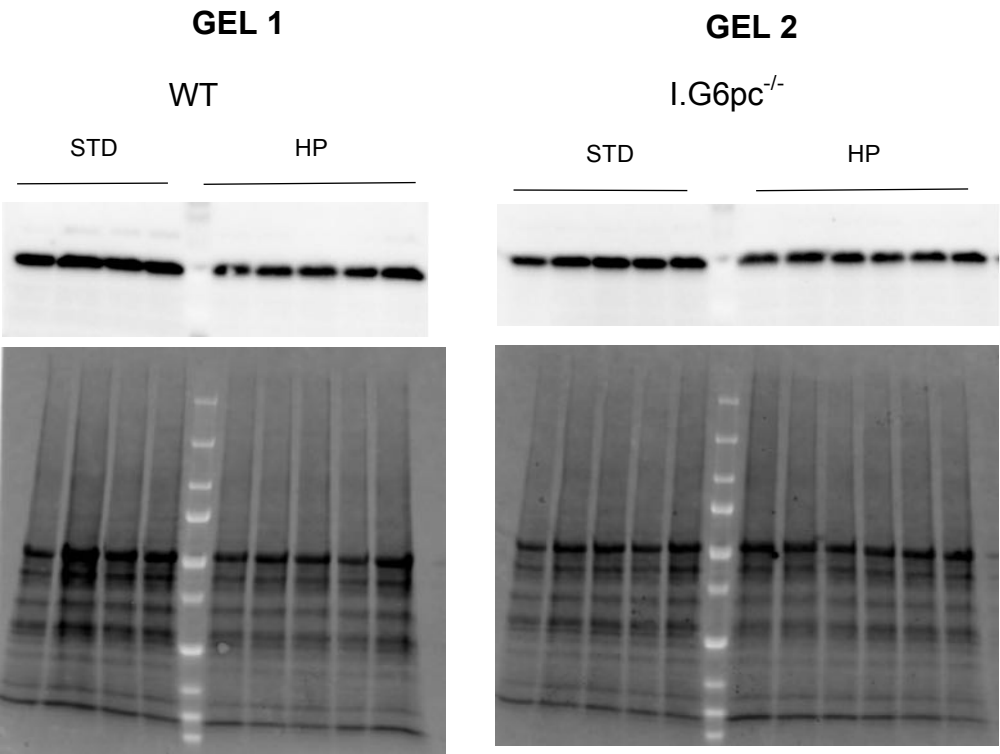

|      |         |                           | Volume (Int) | Norm. factor | Norm. Vol. (Int) |
|------|---------|---------------------------|--------------|--------------|------------------|
| Gel1 | Lane 1  | WT-STD                    | 49884375     | 1            | 49884375         |
|      | Lane 2  |                           | 59780500     | 0.506506     | 30279153         |
|      | Lane 3  |                           | 58926845     | 0.783147     | 46148399         |
|      | Lane 4  |                           | 60109875     | 0.757214     | 45516040         |
|      | Lane 6  | WT-HP                     | 33077325     | 1.07441      | 35538621         |
|      | Lane 7  |                           | 37846845     | 0.971979     | 36786331         |
|      | Lane 8  |                           | 40358510     | 0.852538     | 34407149         |
|      | Lane 9  |                           | 38985675     | 0.944851     | 36835641         |
|      | Lane 10 |                           | 50868845     | 0.570582     | 29024844         |
|      |         |                           |              |              |                  |
| Gel2 | Lane 1  | I-G6PC <sup>-/-</sup> STD | 28070000     | 1            | 28070000         |
|      | Lane 2  |                           | 42619640     | 0.65379      | 27864309         |
|      | Lane 3  |                           | 46294430     | 0.66144      | 30621003         |
|      | Lane 4  |                           | 40281150     | 0.878834     | 35400449         |
|      | Lane 5  |                           | 39070850     | 0.694411     | 27131227         |
|      | Lane 6  | I-G6PC <sup>-/-</sup> HP  | 32724860     | 0.697169     | 22814748         |
|      | Lane 7  |                           | 39309480     | 0.839041     | 32982251         |
|      | Lane 8  |                           | 35517510     | 0.784475     | 27862590         |
|      | Lane 9  |                           | 30389730     | 0.847333     | 25750206         |
|      | Lane 10 |                           | 33975693     | 0.774739     | 26322287         |
|      | Lane 11 |                           | 36305746     | 0.696936     | 25302772         |

Hypothalamus

GR

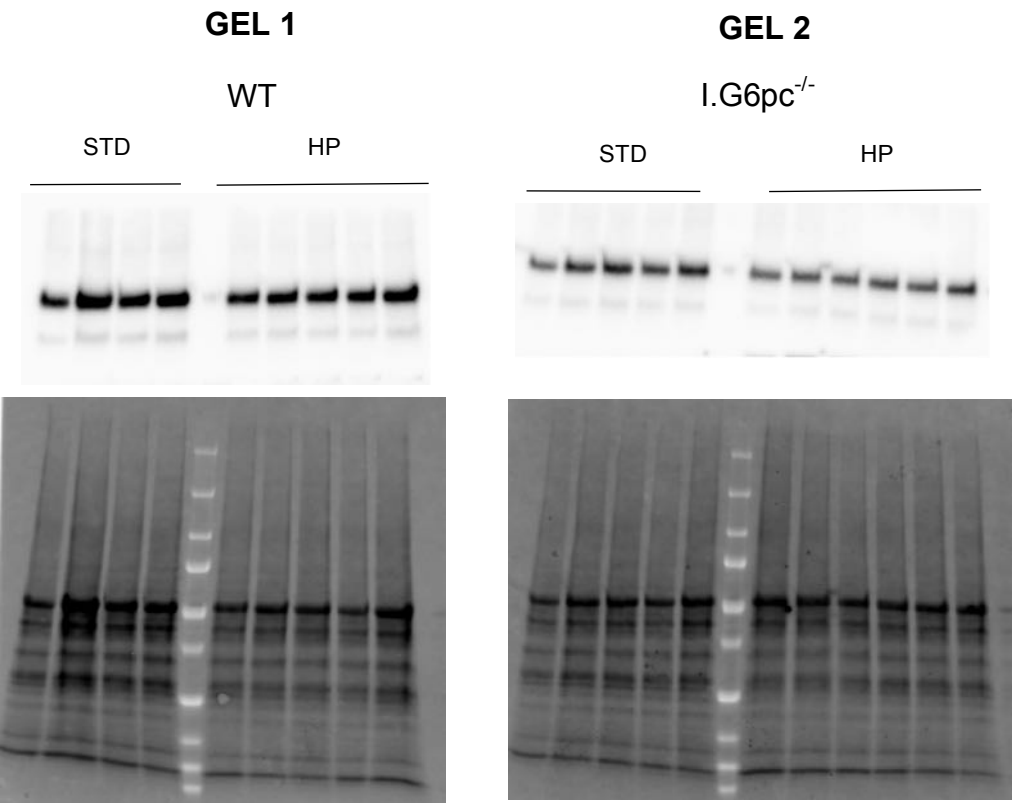

|      |         |                           | Volume (Int) | Norm. factor | Norm. Vol. (Int) |
|------|---------|---------------------------|--------------|--------------|------------------|
| Gel1 | Lane 1  | WT-STD                    | 29794224     | 1            | 29794224         |
|      | Lane 2  |                           | 54154768     | 0.506506     | 27429714.92      |
|      | Lane 3  |                           | 42441542     | 0.783147     | 33237966.29      |
|      | Lane 4  |                           | 52417652     | 0.757214     | 39691379.94      |
|      | Lane 6  | WT-HP                     | 34500892     | 1.07441      | 37068103.37      |
|      | Lane 7  |                           | 37090942     | 0.971979     | 36051616.71      |
|      | Lane 8  |                           | 37200620     | 0.852538     | 31714942.17      |
|      | Lane 9  |                           | 35193618     | 0.944851     | 33252725.16      |
|      | Lane 10 |                           | 47231538     | 0.570582     | 26949465.42      |
|      |         |                           |              |              |                  |
| Gel2 | Lane 1  | I-G6PC <sup>-/-</sup> STD | 15678676     | 1            | 15678676         |
|      | Lane 2  |                           | 24290396     | 0.65379      | 15880818         |
|      | Lane 3  |                           | 28341248     | 0.66144      | 18746035         |
|      | Lane 4  |                           | 21287968     | 0.878834     | 18708590         |
|      | Lane 5  |                           | 27342848     | 0.694411     | 18987174         |
|      | Lane 6  | I-G6PC <sup>-/-</sup> HP  | 18688644     | 0.697169     | 13029143         |
|      | Lane 7  |                           | 20634952     | 0.839041     | 17313571         |
|      | Lane 8  |                           | 19371924     | 0.784475     | 15196790         |
|      | Lane 9  |                           | 20385040     | 0.847333     | 17272917         |
|      | Lane 10 |                           | 20433972     | 0.774739     | 15830995         |
|      | Lane 11 |                           | 23937160     | 0.696936     | 16682669         |

Hippocampus

GR

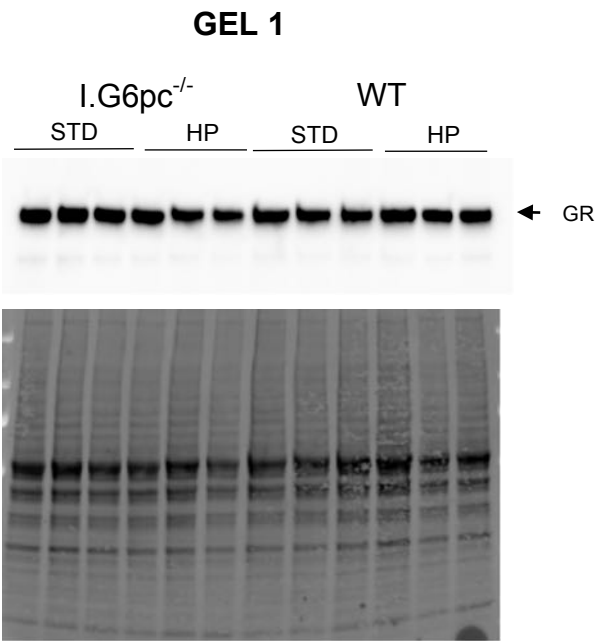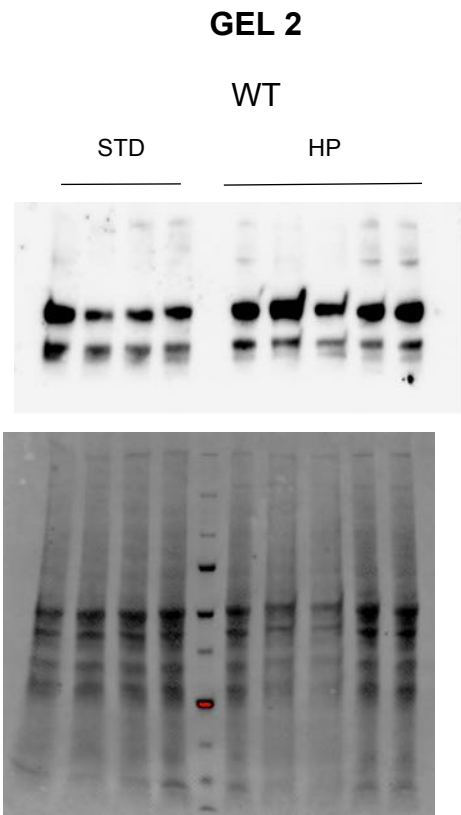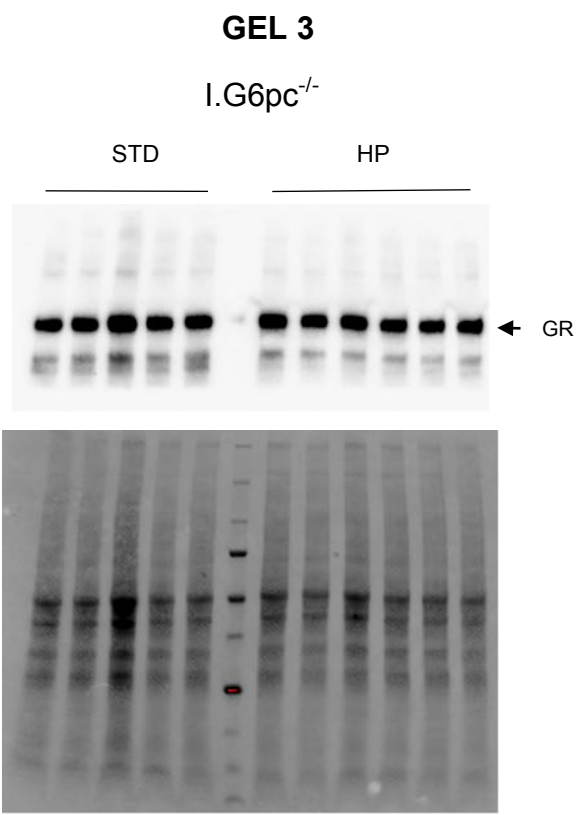

|      |         |                           | Volume (Int) | Norm. factor | Norm. Vol. (Int) |
|------|---------|---------------------------|--------------|--------------|------------------|
| Gel1 | Lane 1  | I-G6PC <sup>-/-</sup> STD | 58435986     | 1            | 58435986         |
|      | Lane 2  |                           | 60352248     | 0.868971     | 52444344         |
|      | Lane 3  |                           | 54034482     | 1.101908     | 59541049         |
|      | Lane 4  | I-G6PC <sup>-/-</sup> HP  | 54352554     | 1.10277      | 59938360         |
|      | Lane 5  |                           | 40353268     | 0.938906     | 37887930         |
|      | Lane 6  |                           | 34192450     | 1.44342      | 49354065         |
|      | Lane 7  | WT-STD                    | 49063592     | 1.069341     | 52465730         |
|      | Lane 8  |                           | 43791566     | 1.261817     | 55256925         |
|      | Lane 9  |                           | 41642144     | 1.135418     | 47281243         |
|      | Lane 10 | WT-HP                     | 54300296     | 0.930491     | 50525926         |
|      | Lane 11 |                           | 45617580     | 1.501374     | 68489032         |
|      | Lane 12 |                           | 47023790     | 1.351804     | 63566937         |

|      |         |        | Volume (Int) | Norm. factor | Norm. Vol. (Int) |
|------|---------|--------|--------------|--------------|------------------|
| Gel2 | Lane 1  | WT-STD | 10160490     | 1            | 10160490         |
|      | Lane 2  |        | 2776980      | 0.955422     | 2653188          |
|      | Lane 3  |        | 3233312      | 0.950279     | 3072548          |
|      | Lane 4  |        | 3535376      | 0.826515     | 2922041          |
|      | Lane 6  | WT-HP  | 8762936      | 0.87945      | 7706564          |
|      | Lane 7  |        | 15597588     | 0.915346     | 14277190         |
|      | Lane 8  |        | 4667052      | 1.122793     | 5240133          |
|      | Lane 9  |        | 7881042      | 0.867374     | 6835811          |
|      | Lane 10 |        | 11985091     | 0.858134     | 10284814         |

|      |         |                           | Volume (Int) | Norm. factor | Norm. Vol. (Int) |
|------|---------|---------------------------|--------------|--------------|------------------|
| Gel3 | Lane 1  | I-G6PC <sup>-/-</sup> STD | 15678676     | 1            | 15678676         |
|      | Lane 2  |                           | 24290396     | 0.645892     | 15688984         |
|      | Lane 3  |                           | 28341248     | 0.65453      | 18550192         |
|      | Lane 4  |                           | 21287968     | 0.798368     | 16995626         |
|      | Lane 5  |                           | 27342848     | 0.68541      | 18741057         |
|      | Lane 6  | I-G6PC <sup>-/-</sup> HP  | 18688644     | 0.651825     | 12181720         |
|      | Lane 7  |                           | 20634952     | 0.73264      | 15117995         |
|      | Lane 8  |                           | 19371924     | 0.851156     | 16488537         |
|      | Lane 9  |                           | 20385040     | 0.803237     | 16374026         |
|      | Lane 10 |                           | 20433972     | 0.771909     | 15773176         |
|      | Lane 11 |                           | 23937160     | 0.784994     | 18790535         |

BDNF

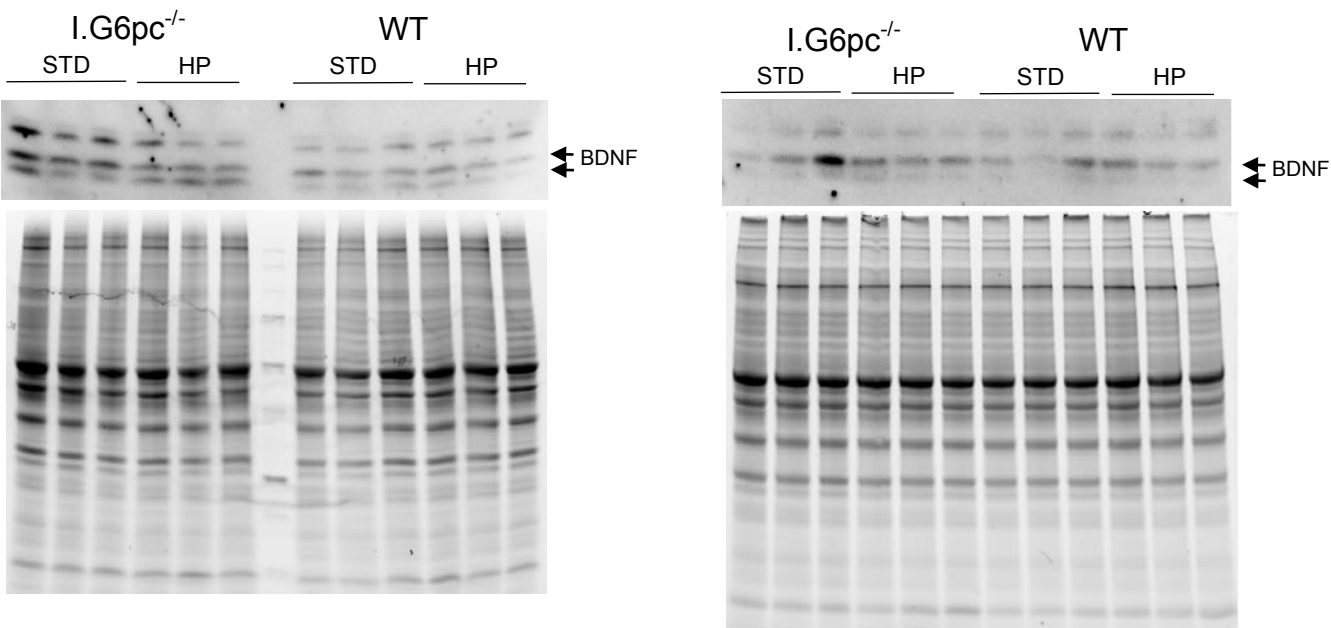

|      |         |                           | Volume (Int) | Norm. factor | Norm. Vol. (Int) |
|------|---------|---------------------------|--------------|--------------|------------------|
| Gel1 | Lane 1  | I-G6PC <sup>-/-</sup> STD | 6079536      | 1            | 6079536          |
|      | Lane 2  |                           | 3487824      | 2.795314     | 9749563          |
|      | Lane 3  |                           | 4050936      | 2.903329     | 11761200         |
|      | Lane 4  | I-G6PC <sup>-/-</sup> HP  | 3883896      | 2.497153     | 9698683          |
|      | Lane 5  |                           | 4596264      | 2.86925      | 13187830         |
|      | Lane 6  |                           | 3497688      | 2.61797      | 9156842          |
|      | Lane 7  | WT-STD                    | 2509200      | 3.10138      | 7781983          |
|      | Lane 8  |                           | 2010888      | 2.861712     | 5754582          |
|      | Lane 9  |                           | 2336040      | 2.400201     | 5606966          |
|      | Lane 10 | WT-HP                     | 2376504      | 2.346937     | 5577505          |
|      | Lane 11 |                           | 1826496      | 2.493432     | 4554244          |
|      | Lane 12 |                           | 801000       | 2.18823      | 1752772          |
| Gel2 | Lane 1  | I-G6PC <sup>-/-</sup> STD | 912320       | 1            | 912320           |
|      | Lane 2  |                           | 1535780      | 0.905        | 1389881          |
|      | Lane 3  |                           | 1877400      | 0.699481     | 1313206          |
|      | Lane 4  | I-G6PC <sup>-/-</sup> HP  | 1959298      | 0.896588     | 1756683          |
|      | Lane 5  |                           | 1423334      | 0.889549     | 1266125          |
|      | Lane 6  |                           | 1629147      | 1.02226      | 1665412          |
|      | Lane 7  | WT-STD                    | 1450785      | 0.92765      | 1345821          |
|      | Lane 8  |                           | 1353016      | 0.812447     | 1099254          |
|      | Lane 9  |                           | 1807225      | 1.009963     | 1825230          |
|      | Lane 10 | WT-HP                     | 1553696      | 0.952718     | 1480234          |
|      | Lane 11 |                           | 1305675      | 1.070944     | 1398305          |
|      | Lane 12 |                           | 1318939      | 0.973576     | 1284087          |

# RAW DATA Figure S3

## Hippocampus-AKT

### GEL 1

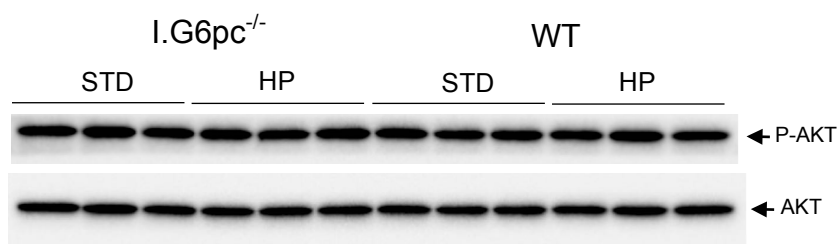

### GEL 2

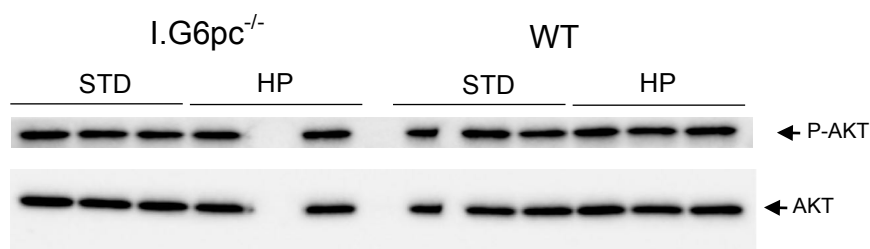

|      |         |                           | P-AKT   | AKT     | RATIO |
|------|---------|---------------------------|---------|---------|-------|
| Gel1 | Lane 1  | I-G6PC <sup>-/-</sup> STD | 1973653 | 1909795 | 1.03  |
|      | Lane 2  |                           | 2292885 | 2017820 | 1.14  |
|      | Lane 3  |                           | 1838745 | 1820852 | 1.01  |
|      | Lane 4  | I-G6PC <sup>-/-</sup> HP  | 1907939 | 1789184 | 1.07  |
|      | Lane 5  |                           | 1707520 | 1824448 | 0.94  |
|      | Lane 6  |                           | 2052301 | 1805366 | 1.14  |
|      | Lane 7  | WT-STD                    | 1886160 | 1766129 | 1.07  |
|      | Lane 8  |                           | 1602569 | 1667529 | 0.96  |
|      | Lane 9  |                           | 1798232 | 1734519 | 1.04  |
|      | Lane 10 | WT-HP                     | 1690352 | 1714480 | 0.99  |
|      | Lane 11 |                           | 1971304 | 1833554 | 1.08  |
|      | Lane 12 |                           | 1620955 | 1801712 | 0.90  |
| Gel2 | Lane 1  | I-G6PC <sup>-/-</sup> STD | 1609703 | 1993344 | 0.81  |
|      | Lane 2  |                           | 1337393 | 1746902 | 0.77  |
|      | Lane 3  |                           | 1224612 | 1752093 | 0.70  |
|      | Lane 4  | I-G6PC <sup>-/-</sup> HP  | 1329650 | 1639863 | 0.81  |
|      | Lane 5  |                           |         |         |       |
|      | Lane 6  |                           | 1422015 | 1574642 | 0.90  |
|      | Lane 7  | WT-STD                    | 999340  | 1066968 | 0.94  |
|      | Lane 8  |                           | 1516555 | 1489962 | 1.02  |
|      | Lane 9  |                           | 1227976 | 1593318 | 0.77  |
|      | Lane 10 | WT-HP                     | 1468096 | 1724746 | 0.85  |
|      | Lane 11 |                           | 1307030 | 1500112 | 0.87  |
|      | Lane 12 |                           | 1518324 | 1653696 | 0.92  |

# RAW DATA Figure S7

## Hippocampus-GSK3

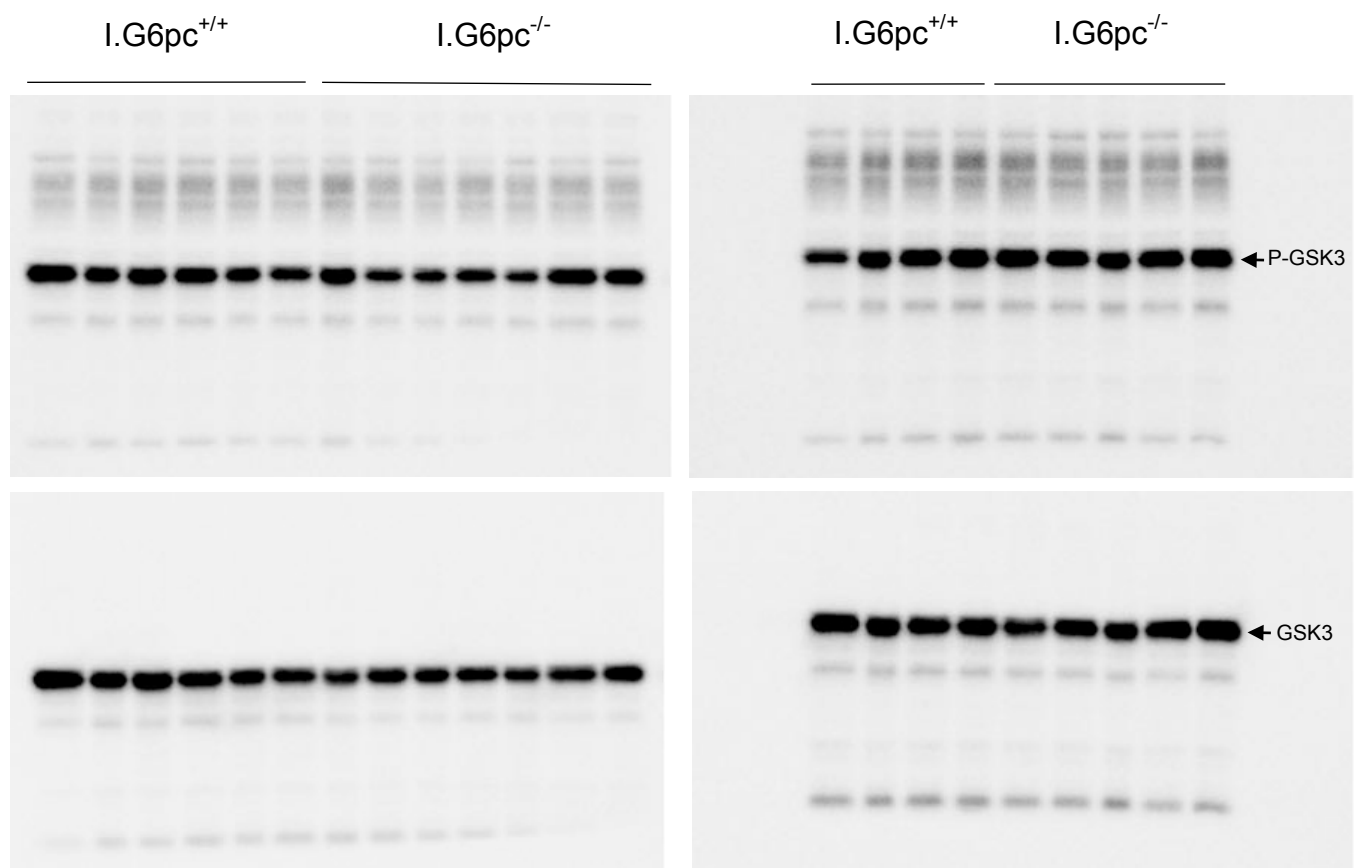

|                       |       | samples | P-GSK3  | GSK3    | P-GSK3/GSK3 | mean | T-test GSK3 levels |
|-----------------------|-------|---------|---------|---------|-------------|------|--------------------|
| I.G6pc <sup>+/+</sup> | Gel 1 | Lane 1  | 2870848 | 3678180 | 0.78        | 0.79 | 0.34               |
|                       |       | Lane 2  | 1923424 | 2573970 | 0.75        |      |                    |
|                       |       | Lane 3  | 2190272 | 3090930 | 0.71        |      |                    |
|                       |       | Lane 4  | 2357632 | 2667600 | 0.88        |      |                    |
|                       |       | Lane 5  | 1740064 | 2235450 | 0.78        |      |                    |
|                       |       | Lane 6  | 1652256 | 2241120 | 0.74        |      |                    |
|                       | Gel 2 | Lane 1  | 1297032 | 3156832 | 0.41        |      |                    |
|                       |       | Lane 2  | 1901450 | 2378112 | 0.80        |      |                    |
|                       |       | Lane 3  | 2322234 | 2346176 | 0.99        |      |                    |
|                       |       | Lane 4  | 2635442 | 2426880 | 1.09        |      |                    |
| I.G6pc <sup>-/-</sup> | Gel 1 | Lane 1  | 2095872 | 1769730 | 1.18        | 0.88 |                    |
|                       |       | Lane 2  | 1405888 | 2260560 | 0.62        |      |                    |
|                       |       | Lane 3  | 1323168 | 2118720 | 0.62        |      |                    |
|                       |       | Lane 4  | 1563648 | 2104380 | 0.74        |      |                    |
|                       |       | Lane 5  | 1329376 | 1851270 | 0.72        |      |                    |
|                       |       | Lane 6  | 2343392 | 2213040 | 1.06        |      |                    |
|                       |       | Lane 7  | 2054528 | 2427000 | 0.85        |      |                    |

|  |       |        |         |         |      |  |  |
|--|-------|--------|---------|---------|------|--|--|
|  | Gel 2 | Lane 1 | 2567476 | 1942048 | 1.32 |  |  |
|  |       | Lane 2 | 2294388 | 2452896 | 0.94 |  |  |
|  |       | Lane 3 | 1996412 | 2153152 | 0.93 |  |  |
|  |       | Lane 4 | 2373472 | 2759616 | 0.86 |  |  |
|  |       | Lane 5 | 2402066 | 3491776 | 0.69 |  |  |

# RAW DATA – FIGURE S8

## Hypothalamus

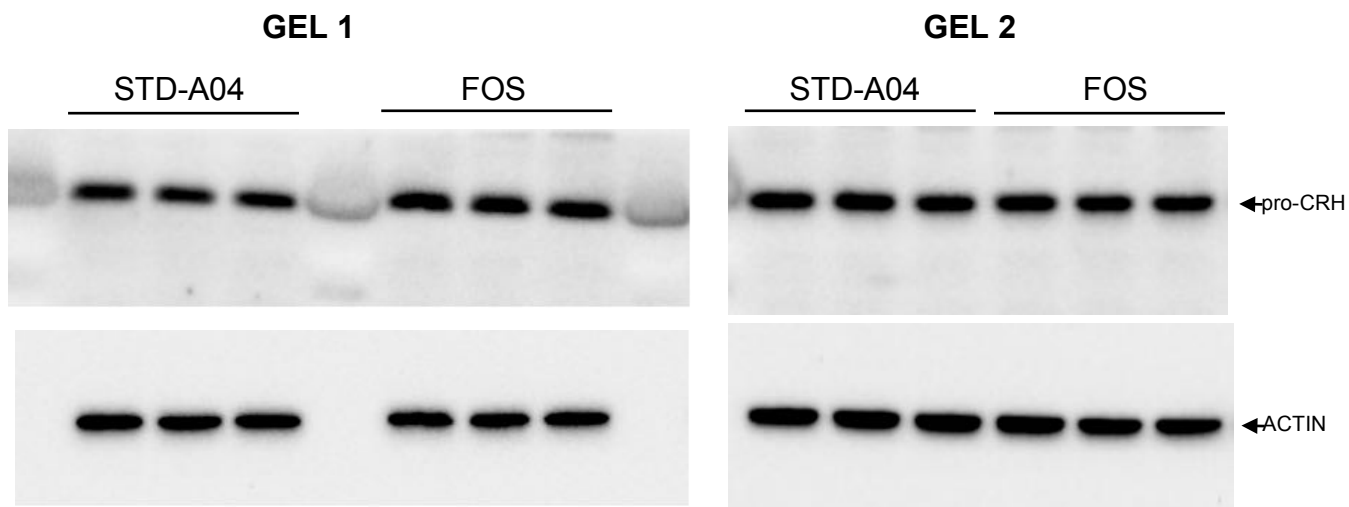

|         |       |        | pro-CRH | Actin   | pro-CRH/ACTIN | Mean | T-test Actin |
|---------|-------|--------|---------|---------|---------------|------|--------------|
| STD-A04 | Gel1  | Lane 1 | 1366484 | 1515648 | 0.90          | 0.92 | 0.12         |
|         |       | Lane 2 | 1317762 | 1402152 | 0.94          |      |              |
|         |       | Lane 3 | 1376396 | 1451184 | 0.95          |      |              |
|         | Gel2  | Lane 1 | 1705928 | 1739948 | 0.98          |      |              |
|         |       | Lane 2 | 1733940 | 1899126 | 0.91          |      |              |
|         |       | Lane 3 | 1534288 | 1849801 | 0.83          |      |              |
| FOS     | Gel 1 | Lane 4 | 1518408 | 1370928 | 1.11          | 1.00 |              |
|         |       | Lane 5 | 1353864 | 1275576 | 1.06          |      |              |
|         |       | Lane 6 | 1420176 | 1334448 | 1.06          |      |              |
|         | Gel 2 | Lane 4 | 1476456 | 1813914 | 0.81          |      |              |
|         |       | Lane 5 | 1353024 | 1460706 | 0.93          |      |              |
|         |       | Lane 6 | 1421616 | 1406340 | 1.01          |      |              |

# Hippocampus

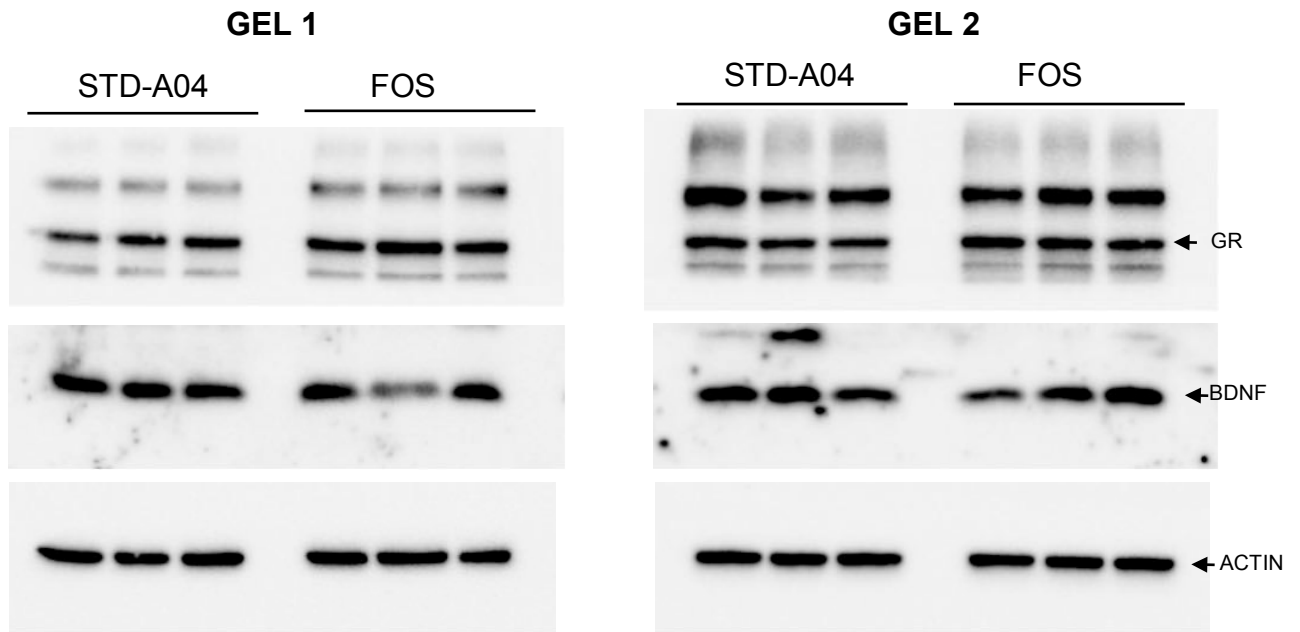

|         |       |        | GR      | Actin   | GR/ACTIN | Mean | T-test Actin |
|---------|-------|--------|---------|---------|----------|------|--------------|
| STD-A04 | Gel1  | Lane 1 | 811971  | 1833750 | 0.44     | 0.60 | 0.85         |
|         |       | Lane 2 | 1065779 | 1481850 | 0.72     |      |              |
|         |       | Lane 3 | 1353488 | 2055870 | 0.66     |      |              |
|         | Gel2  | Lane 1 | 1315366 | 1958112 | 0.67     |      |              |
|         |       | Lane 2 | 1062672 | 1767424 | 0.60     |      |              |
|         |       | Lane 3 | 960960  | 1936096 | 0.50     |      |              |
| FOS     | Gel 1 | Lane 4 | 1487091 | 2029350 | 0.73     | 0.79 |              |
|         |       | Lane 5 | 1920786 | 2159290 | 0.89     |      |              |
|         |       | Lane 6 | 1454785 | 1495080 | 0.97     |      |              |
|         | Gel 2 | Lane 4 | 1471652 | 1787328 | 0.82     |      |              |
|         |       | Lane 5 | 1290458 | 1787392 | 0.72     |      |              |
|         |       | Lane 6 | 1111266 | 1920576 | 0.58     |      |              |

|         |       |        | BDNF    | Actin   | BDNF/ACTIN | Mean | T-test Actin |
|---------|-------|--------|---------|---------|------------|------|--------------|
| STD-A04 | Gel1  | Lane 1 | 1898304 | 1833750 | 1.04       | 1.09 | 0.85         |
|         |       | Lane 2 | 1964576 | 1481850 | 1.33       |      |              |
|         |       | Lane 3 | 1898848 | 2055870 | 0.92       |      |              |
|         | Gel2  | Lane 1 | 2055328 | 1958112 | 1.05       |      |              |
|         |       | Lane 2 | 2503232 | 1767424 | 1.42       |      |              |
|         |       | Lane 3 | 1523872 | 1936096 | 0.79       |      |              |
| FOS     | Gel 1 | Lane 4 | 1968160 | 2029350 | 0.97       | 0.94 |              |
|         |       | Lane 5 | 1258272 | 2159290 | 0.58       |      |              |
|         |       | Lane 6 | 1819936 | 1495080 | 1.22       |      |              |
|         | Gel 2 | Lane 4 | 1175200 | 1787328 | 0.66       |      |              |
|         |       | Lane 5 | 1652352 | 1787392 | 0.92       |      |              |
|         |       | Lane 6 | 2493760 | 1920576 | 1.30       |      |              |
