# Supplementary material
Source: publisher figshare collection journal article supplement (https://karger.figshare.com/articles/dataset/_/14247101)

Figure S3, Sinet et al.: Plasma insulin levels and phosphorylation levels of AKT in WT and I-G6pc<sup>-/-</sup> mice fed either a standard or high-protein diet.

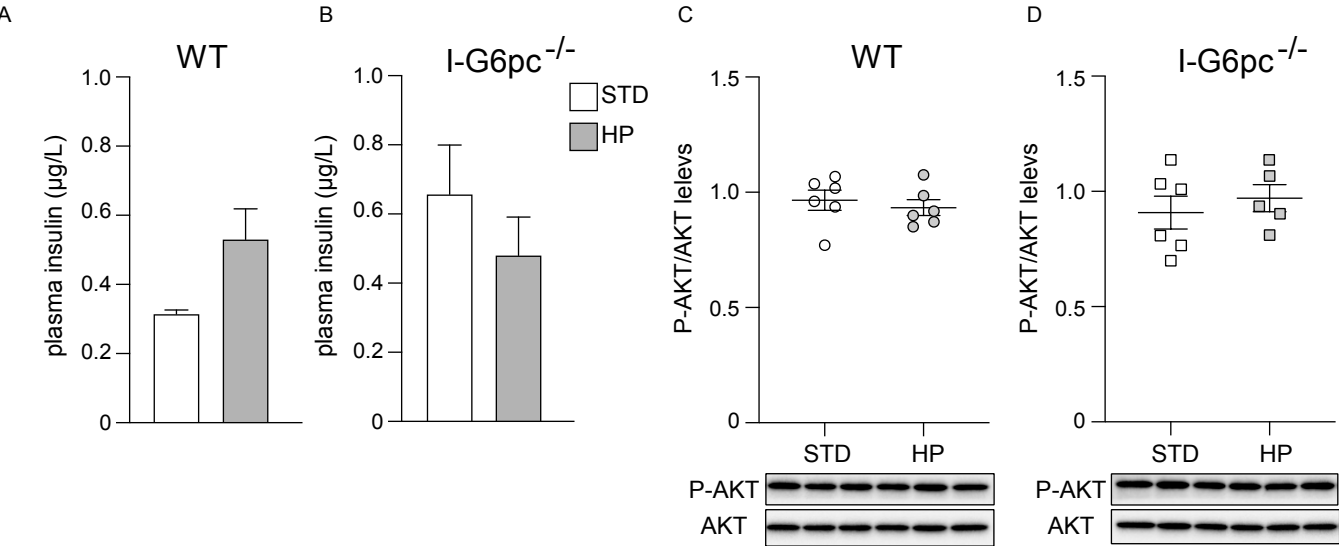

Supplement: Supplementary file 7 [file 1]
