# Supplementary material
Source: publisher figshare collection journal article supplement (https://karger.figshare.com/articles/dataset/_/14247101)

Figure S4, Sinet et al.: Behavior tests I-G6pc<sup>+/+</sup>, wild-type and I-G6pc<sup>-/-</sup> mice.

### I.G6pc<sup>+/+</sup> MICE

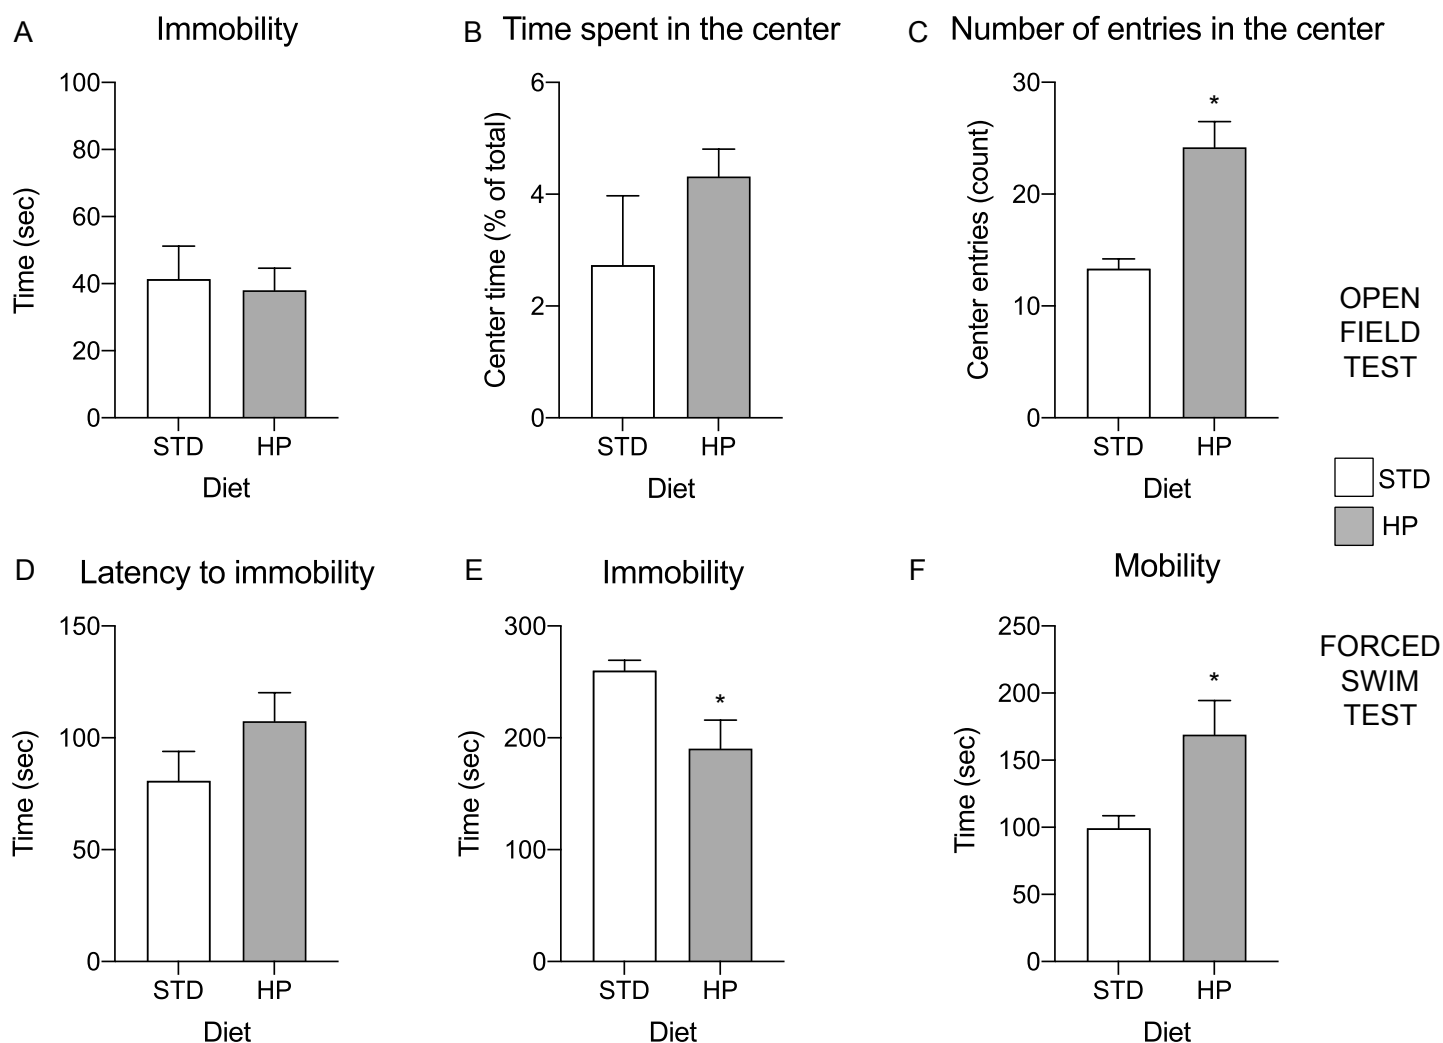

### WT and I.G6pc<sup>-/-</sup> MICE

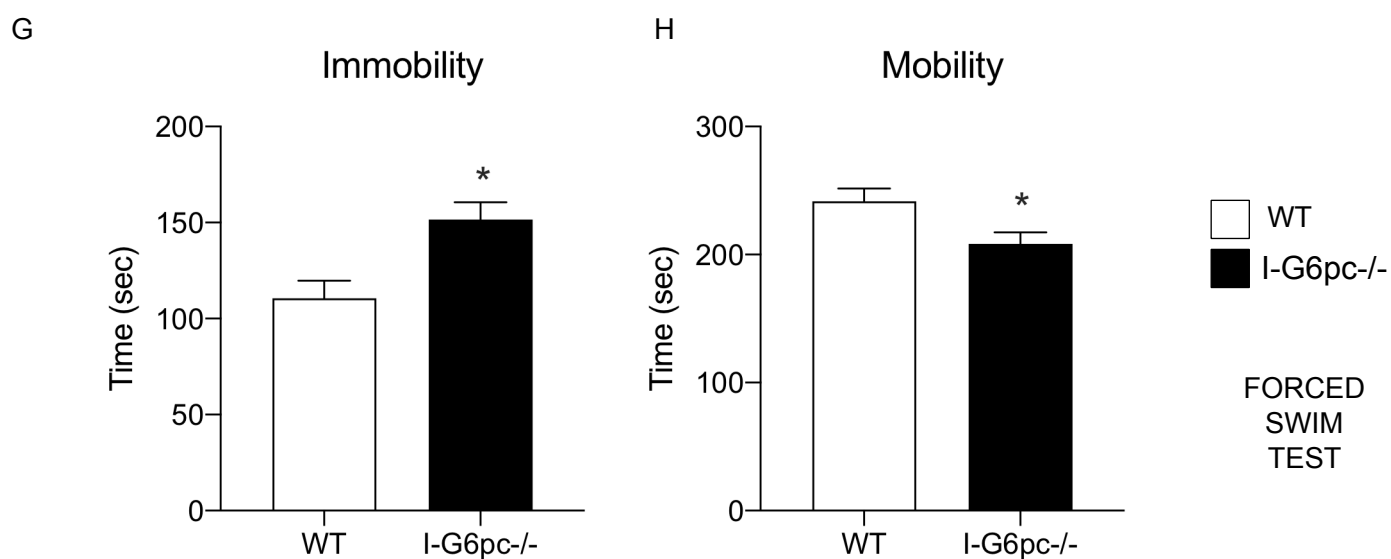

Supplement: Supplementary file 8 [file 1]
