# Supplementary material
Source: publisher figshare collection journal article supplement (https://karger.figshare.com/articles/dataset/_/14247101)
Supplement: Supplementary file 9 [file 1]

Archive with 10 entries (10 files):
- Supplementary material-Fig_S1__Sinet_et_al.pdf
- Supplementary material-Fig_S2__Sinet_et_al.pdf
- Supplementary material-Fig_S3__SInet_et_al.pdf
- Supplementary material-Fig_S4__Sinet_et_al.pdf
- Supplementary material-Fig_S5_Sinet_et_al.pdf
- Supplementary material-Fig_S6_Sinet_et_al.pdf
- Supplementary material-Fig_S7__Sinet_et_al.pdf
- Supplementary material-Fig_S8__Sinet_et_al.pdf
- Supplementary material-Fig_S9__SInet_et_al.pdf
- Supplementary material-SI_Sinet_et_al_sup_data_legends.docx
