# Supplementary material
Source: publisher figshare collection journal article supplement (https://karger.figshare.com/articles/dataset/_/14247101)

Figure S6, Sinet et al.: No impairment of 5-HT transmission in the ventral hippocampus of I-G6pc<sup>-/-</sup> mice.

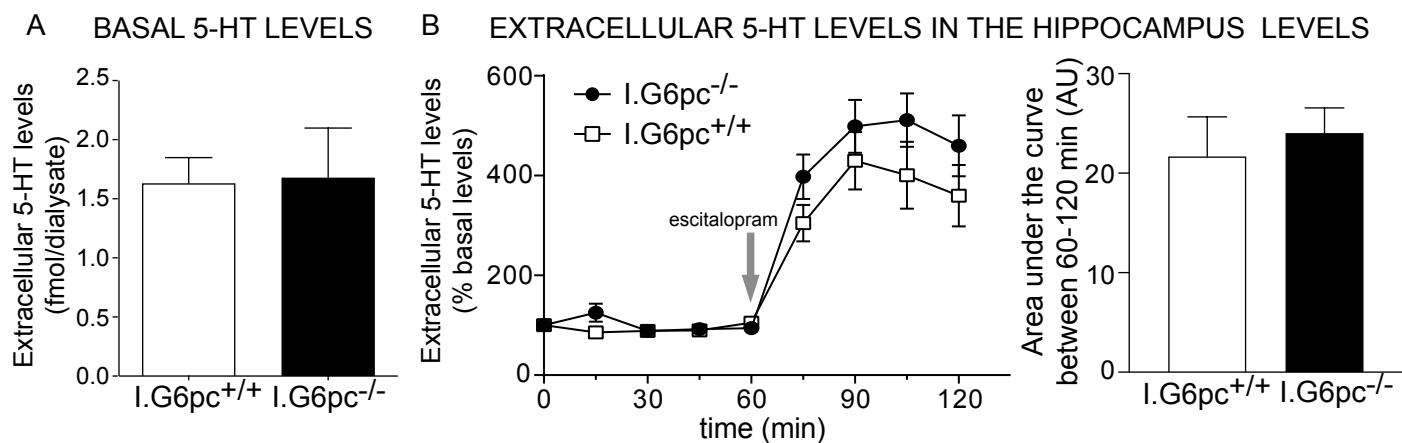

Supplement: Supplementary file 9 [file 1 › Supplementary material-Fig_S6_Sinet_et_al.pdf]
