# Supplementary material
Source: publisher figshare collection journal article supplement (https://karger.figshare.com/articles/dataset/_/14247101)
Supplement: Supplementary file 9 [file 1 › Supplementary material-SI_Sinet_et_al_sup_data_legends.docx]

**TITLE AND LEGENDS OF SUPPLEMENTARY FIGURES**

**Figure S1:** **Effects of FOS supplementation on behavior in mice fed a HFHS diet. (A-F)** Exploratory behavior in the open field test (OFT) and resignation in the forced swimming test (FST) of wild type (WT) mice. Immobility time **(A)**, time spent in the center **(B)** and number of entries in the center **(C)** in the OFT in WT fed either a HFHS diet (HFHS open bars) or a HFHS-FOS enriched diet (HFHS + 10% FOS gray bars).Latency to immobility **(D)**, immobility time **(E)** and mobility (swimming + climbing) time **(F)** in the FST of WT fed either a HFHS diet (HFHS open bars) or a HFHS-FOS enriched diet (HFHS + 10% FOS gray bars). **(G-L)** Exploratory behavior and resignation of I-G6pc-/- mice. Immobility time **(G)**, time spent in the center **(H)** and number of entries in the center **(I)** in the OFT in I-G6pc-/- fed either a HFHS diet (HFHS open bars) or a HFHS-FOS enriched diet (HFHS + 10% FOS gray bars). **(J)**, immobility time **(K)** and mobility (swimming + climbing) time **(L)** in the FST of I-G6pc-/- fed either a HFHS diet (HFHS open bars) or a HFHS-FOS enriched diet (HFHS + 10% FOS gray bars). *p < 0.05, unpaired Student’s *t*-test. Data are mean ± SEM of n = 12 mice per group.

**Figure S2: Specific intestinal deletion of *G6pc1* and G6Pase activity in I-G6pc-/- mice. (A)** Representative electrophoresis of PCR amplifications of genomic DNA demonstrating the intestinal specific deletion of *G6pc1* induced by tamoxifen injection. The dotted line highlighted that the electrophoresis of the DNA sample from the WT mouse was performed in a parallel experiment. (**B**) Intestinal G6Pase activity measured in WT mice (open bars) and in I-G6pc-/- mice (black bars) fed a chow diet. *p < 0.05, different from WT, unpaired Student’s *t*-test. Data are box plots of n = 12 mice per group.

**Figure S3:** **Plasma insulin levels and phosphorylation levels of AKT in WT and I-G6pc-/- mice fed either a standard or high-protein diet.** Plasma insulin levels (µg/L) in WT fed either a chow diet (STD white bars) or a protein enriched diet (HP gray bars) (**A**) and in I-G6pc-/- fed either a chow diet (STD white bars) or a protein enriched diet (HP gray bars) (**B**). Data are mean ± SEM of n = 6 mice per group. Relative quantification of protein levels and representative western blot of hippocampal P-AKT in WT fed either a chow diet (STD-white circles) or a protein-enriched diet (HP-gray circles) (**C**) and in I-G6pc-/- fed either a chow diet (STD-white squares) or a protein-enriched diet (HP-gray squares) (**D**). Data are mean ± SEM of n = 6 mice per group. Raw data (images and quantification) are presented in Figure S9.

**Figure S4:** **Behavioral tests in I-G6pc+/+, wild-type and I-G6pc-/- mice. (A-F)** Exploratory behavior in the open field test (OFT) and resignation in the forced swimming test (FST) of I-G6pc+/+ mice. Immobility time **(A)**, time spent in the center **(B)** and number of entries in the center **(C)** in the OFT in I-G6pc+/+ fed either a chow diet (STD open bars) or a protein enriched diet (HP gray bars).Latency to immobility **(D)**, immobility time **(E)** and mobility (swimming + climbing) time **(F)** in the FST of I-G6pc+/+ fed either a chow diet (STD open bars) or a protein enriched diet (HP gray bars). Data are mean ± SEM of n = 4 to 5 mice per group. *p < 0.05, unpaired Student’s *t-*test. Immobility time **(G)** and mobility (swimming + climbing) time **(H)** in the FST of WT (open bars) and I-G6pc-/- mice (black bars). Data are mean ± SEM of n = 40 mice per group.

**Figure S5:** **Behavioral tests performed with I-G6pc+/+ and I-G6pc-/- mice.** The elevated plus (EPM) maze was a cross-shaped maze composed of two opened arms and two closed arms. Total distance travelled **(A)**, immobility time **(B)**, time and number of entries **(C, E)** in the opened arms and time and number of entries **(D, F)** in the closed arms of the EPM in I-G6pc+/+ (open bars) and I-G6pc-/- mice (black bars). Data are box plots of n = 9 to 11 mice per group. The white and black box contained a white opened compartment and a smaller enclosed black compartment. Latency before the first exploration **(G)**, number of entries in the white box **(H)**, and time spent in the white box **(I)** inI-G6pc+/+ (open bars) and I-G6pc-/- mice (black bars). Data are box plots of n = 9 to 11 mice per group. During the splash test, grooming behavior was recorded during five minutes after squirting a 10 % sucrose solution on the snout of the mouse. Latency before grooming (**J**) and duration of grooming (**K**) inI-G6pc+/+ (open bars) and I-G6pc-/- mice (black bars). Data are box plots of n = 9 to 11 mice per group.

**Figure S6. No impairment of 5-HT transmission in the ventral hippocampus of I-G6pc-/- mice. (A)** Basal 5-HT extracellular levels (pg.dialysate-1) in the ventral hippocampus in I-G6pc+/+ (white bars) and I-G6pc-/- (black bars) mice. **(B)** 5-HT extracellular levels in the ventral hippocampus before and after escitalopram (10 mg/kg) administration (arrow) in I-G6pc+/+ (white square) and I-G6pc-/- (black circles) mice. Data are expressed as percentage (%) of basal 5-HT extracellular levels. Right panel : areas under the curve (AUC) for 5-HT extracellular levels over the 60–120 min period in I-G6pc+/+ and I-G6pc-/- mice. Data are mean ± SEM of n = 9 to 12 mice per group.

**Figure S7:** **Phosphorylation levels of GSK3β and expression of markers of inflammation in the hippocampus of I-G6pc-/- mice. (A)** Relative quantification of protein levels and representative western blot of hippocampal P-GSK3βinI-G6pc+/+ (white circles) and I-G6pc-/- mice (black circles). Data are mean ± SEM of n = 10 to 12 mice per group. Raw data (images and quantification) are presented in Figure S9. Relative quantification of mRNA levels of IL-6 **(B)** and TNF **(C)** in I-G6pc+/+ (open bars) and I-G6pc-/- (black bars). Data are mean ± SEM of n = 6 to 7 mice per group. *GSK3: glycogen synthase kinase 3; IL6: interleukin 6; TNF: Tumor necrosis factor.*

**Figure S8:** **Protein levels of GR, pro-CRH and BDNF in WT mice fed a FOS enriched diet.** Relative quantification of protein levels and representative western blot of hippocampal GR **(A),** hypothalamic pro-CRH **(B)** and hippocampal BDNF **(C)** of WT mice fed either a chow diet (white circles) or an FOS enriched diet (gray circles). Data are mean ± SEM, n = 6 mice per group. *p < 0.05, unpaired Student’s *t-*test, vs WT fed a STD chow diet. Raw data (images and quantification) are presented in Figure S9.

**Figure S9: Raw data of the blots quantified in the study (images and quantification).** Blots corresponding to the protein of interest, to actin levels and to the total protein levels (stain free) were presented. Each stain free picture was acquired just after the transfer and the same membrane was spliced after transfer to analyze several proteins at the same time. For Figure S3C-D and S7A, the same membrane was analyzed after reblot to quantified the amount of total protein (compared to the phosphorylated form). Arrows indicated the band quantified. Results of the quantification performed with ImageLab (Biorad) were presented on tables below each picture. The relative quantification (as % of saline in Fig. 5 or fold over STD in Fig. 6) was performed for each independent blot and then data were pooled.
