# Supplementary material
Source: publisher figshare collection journal article supplement (https://karger.figshare.com/articles/dataset/_/14247101)

Figure S8, Sinet et al.: Protein levels of GR, pro-CRH and BDNF in WT mice fed a FOS enriched diet.

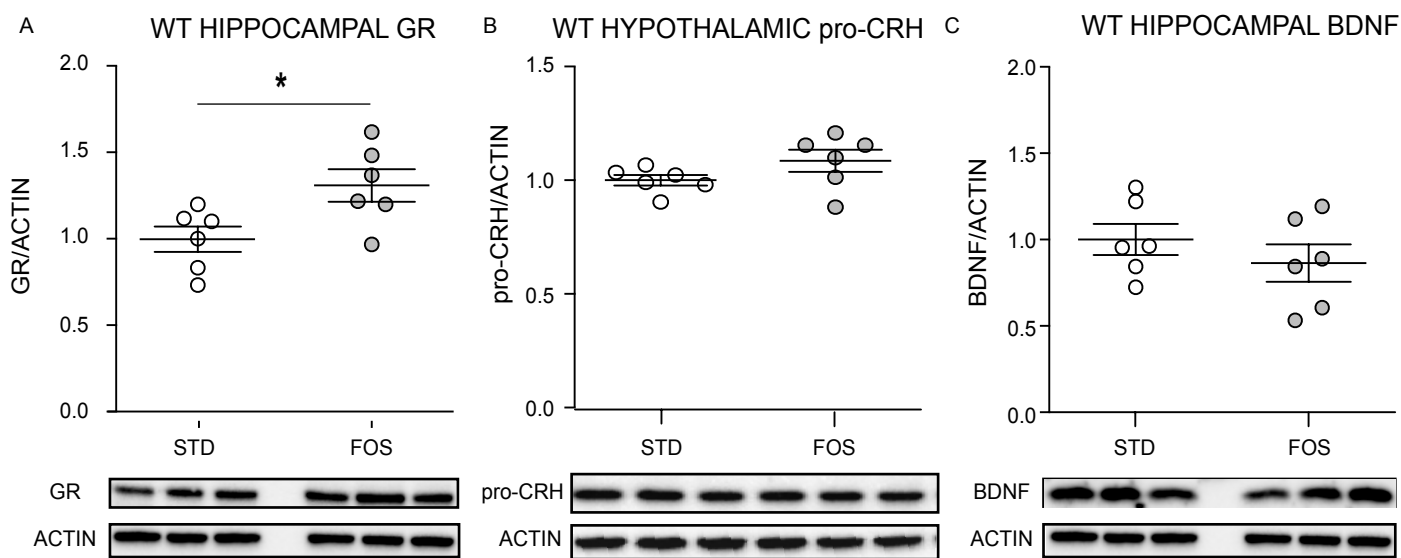

Supplement: Supplementary file 1 [file 1]

Figure S5, Sinet et al.: Behavioral tests performed with I-G6pc<sup>+/+</sup> and I-G6pc<sup>-/-</sup> mice.

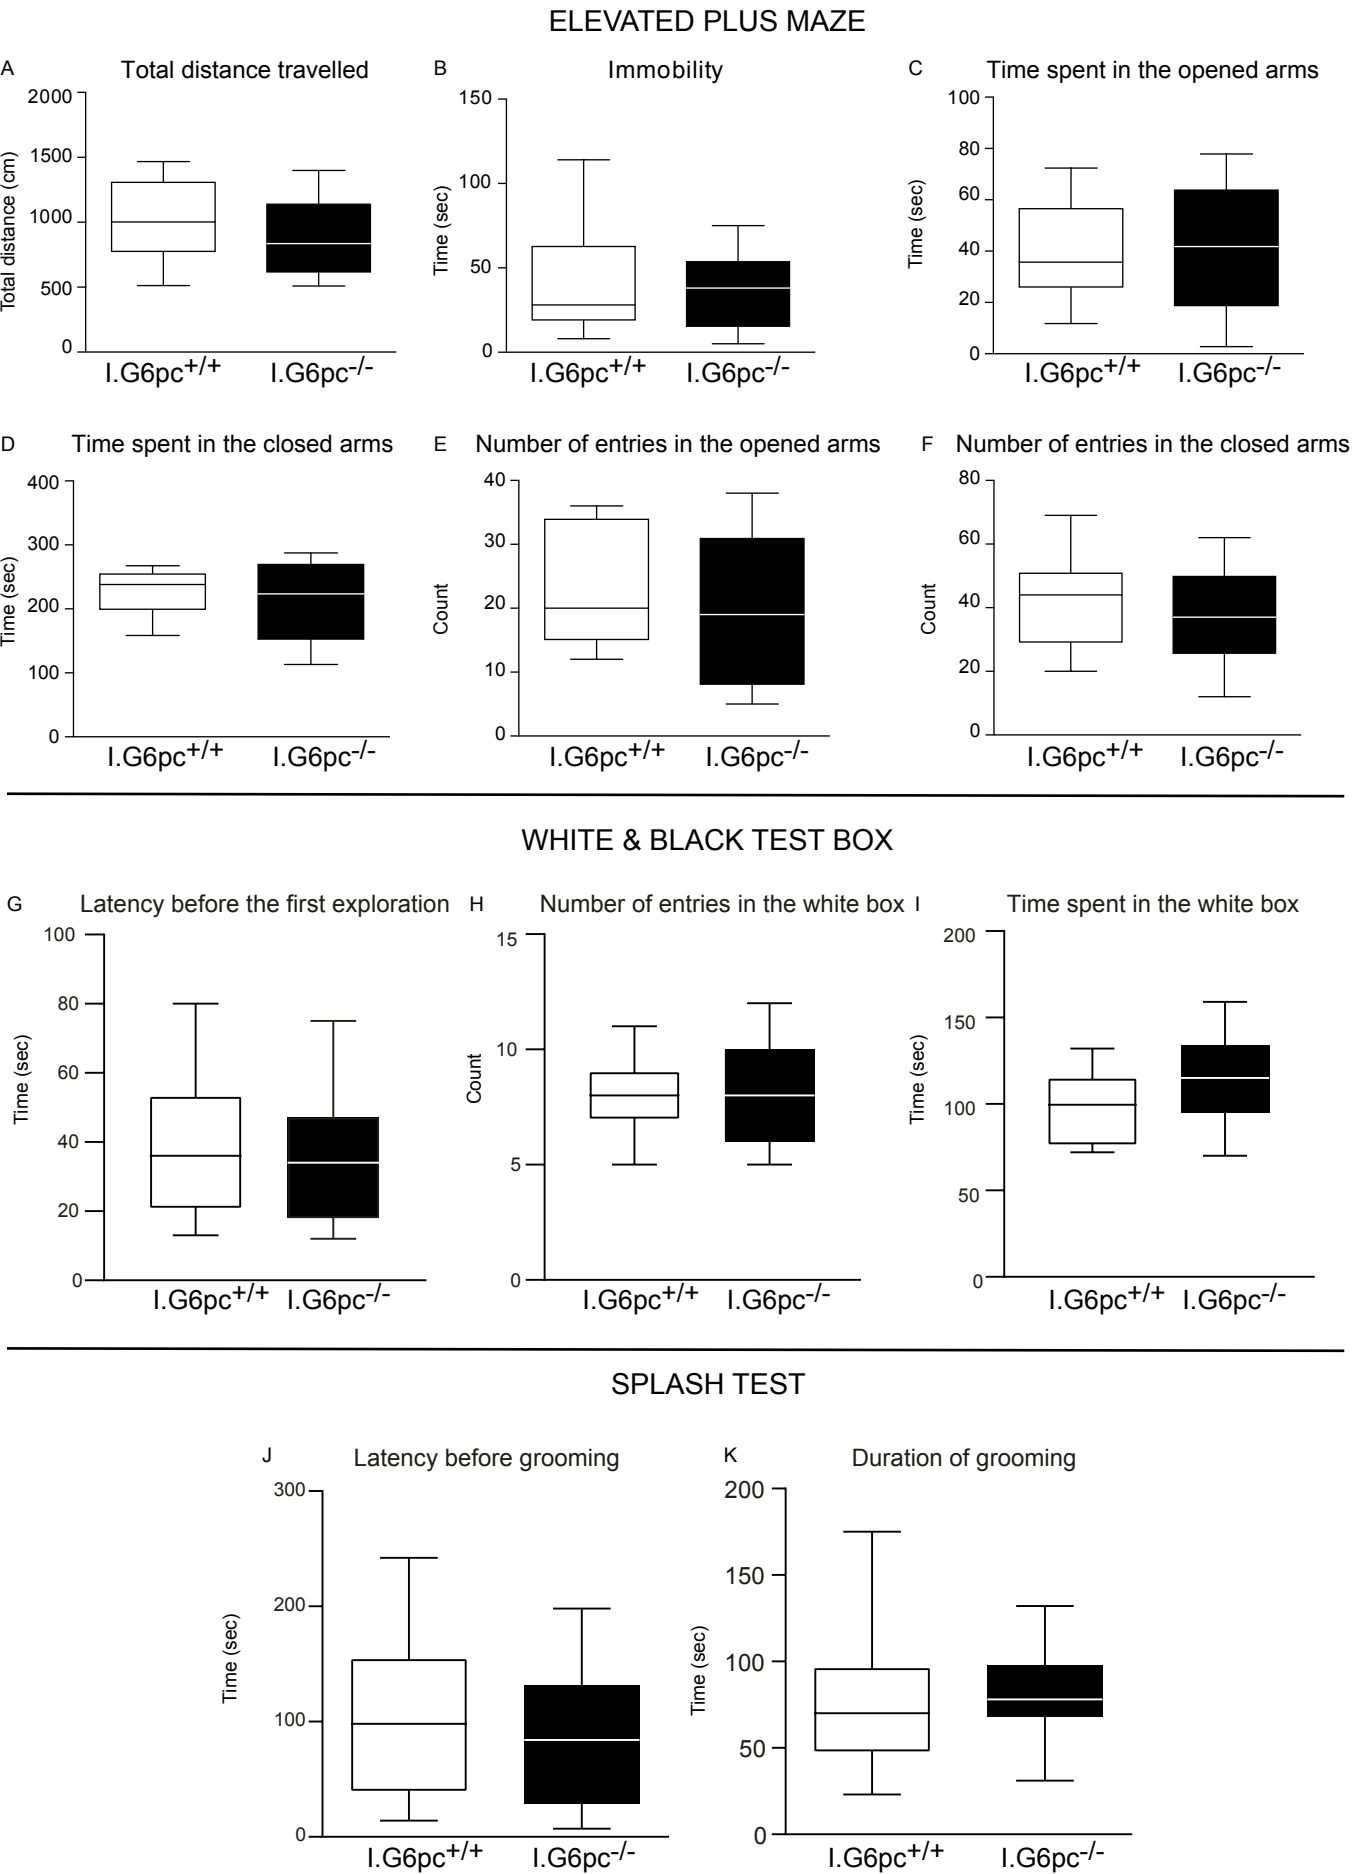

Supplement: Supplementary file 3 [file 1]

Figure S2, Sinet et al. : Specific intestinal deletion of *G6pc1* and G6Pase activity in I-*G6pc*<sup>-/-</sup> mice.

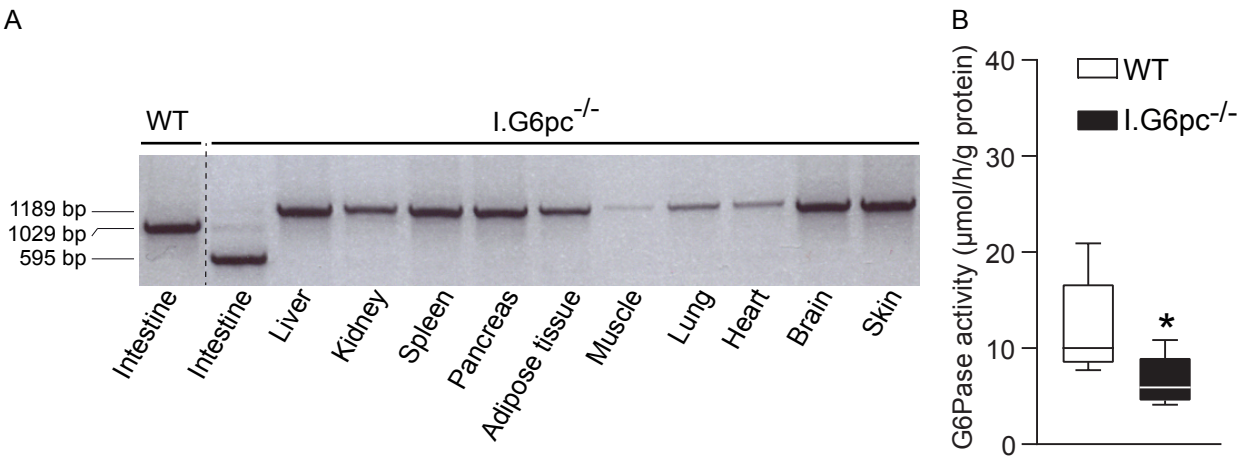

Supplement: Supplementary file 4 [file 1]

Figure S1, Sinet et al. : Effects of FOS supplementation on behavior in mice fed a HFHS diet.

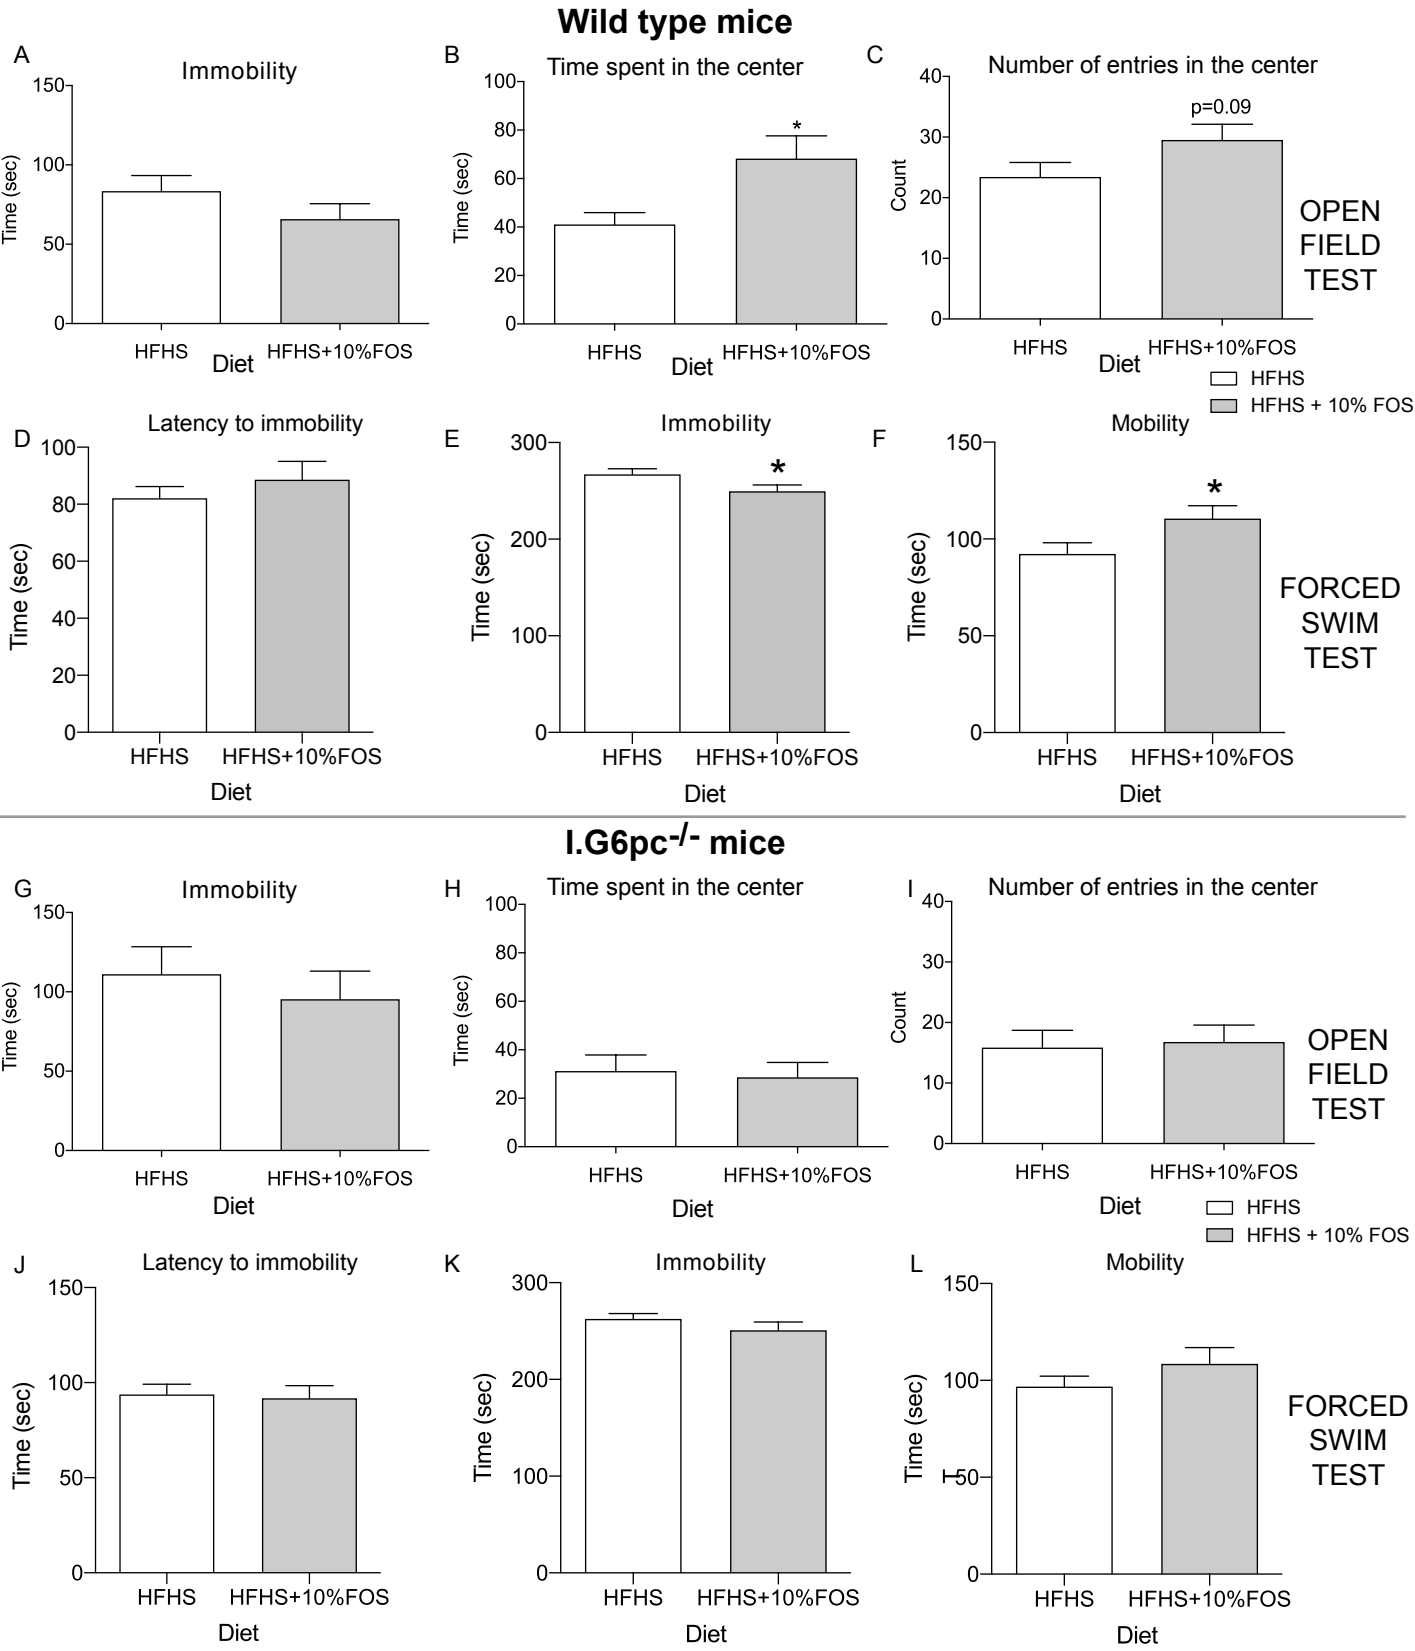

Supplement: Supplementary file 6 [file 1]
